# Supplementary material for: Global monitoring of public interest in preventive measures against COVID-19 via analysis of Google Trends: an infodemiology and infoveillance study
Source: PubMed Central journal article supplement — BMJ Open. 2022 Aug 11;12(8):e060715. doi: 10.1136/bmjopen-2021-060715 (PMC9378949; doi:10.1136/bmjopen-2021-060715), 2022-08-11
Supplement: bmjopen-2021-060715.draft_revisions.pdf [file bmjopen-2021-060715.draft_revisions.pdf]

# BMJ Open

BMJ Open is committed to open peer review. As part of this commitment we make the peer review history of every article we publish publicly available.

When an article is published we post the peer reviewers' comments and the authors' responses online. We also post the versions of the paper that were used during peer review. These are the versions that the peer review comments apply to.

The versions of the paper that follow are the versions that were submitted during the peer review process. They are not the versions of record or the final published versions. They should not be cited or distributed as the published version of this manuscript.

BMJ Open is an open access journal and the full, final, typeset and author-corrected version of record of the manuscript is available on our site with no access controls, subscription charges or pay-per-view fees (<http://bmjopen.bmj.com>).

If you have any questions on BMJ Open's open peer review process please email [info.bmjopen@bmj.com](mailto:info.bmjopen@bmj.com)

# BMJ Open

## Global Monitoring of Public Interest in Preventive Measures against COVID-19 via Analysis of Google Trends: An Infodemiology and Infoveillance Study

|                               |                                                                                                                                                     |
|-------------------------------|-----------------------------------------------------------------------------------------------------------------------------------------------------|
| Journal:                      | <i>BMJ Open</i>                                                                                                                                     |
| Manuscript ID                 | bmjopen-2021-060715                                                                                                                                 |
| Article Type:                 | Original research                                                                                                                                   |
| Date Submitted by the Author: | 14-Jan-2022                                                                                                                                         |
| Complete List of Authors:     | ITO, TOMOO; National Center for Global Health and Medicine                                                                                          |
| Keywords:                     | COVID-19, Health policy < HEALTH SERVICES ADMINISTRATION & MANAGEMENT, Infection control < INFECTIOUS DISEASES, Public health < INFECTIOUS DISEASES |
|                               |                                                                                                                                                     |

SCHOLARONE™  
Manuscripts

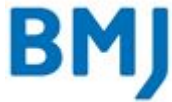

I, the Submitting Author has the right to grant and does grant on behalf of all authors of the Work (as defined in the below author licence), an exclusive licence and/or a non-exclusive licence for contributions from authors who are: i) UK Crown employees; ii) where BMJ has agreed a CC-BY licence shall apply, and/or iii) in accordance with the terms applicable for US Federal Government officers or employees acting as part of their official duties; on a worldwide, perpetual, irrevocable, royalty-free basis to BMJ Publishing Group Ltd ("BMJ") its licensees and where the relevant Journal is co-owned by BMJ to the co-owners of the Journal, to publish the Work in this journal and any other BMJ products and to exploit all rights, as set out in our [licence](#).

The Submitting Author accepts and understands that any supply made under these terms is made by BMJ to the Submitting Author unless you are acting as an employee on behalf of your employer or a postgraduate student of an affiliated institution which is paying any applicable article publishing charge ("APC") for Open Access articles. Where the Submitting Author wishes to make the Work available on an Open Access basis (and intends to pay the relevant APC), the terms of reuse of such Open Access shall be governed by a Creative Commons licence – details of these licences and which [Creative Commons](#) licence will apply to this Work are set out in our licence referred to above.

Other than as permitted in any relevant BMJ Author's Self Archiving Policies, I confirm this Work has not been accepted for publication elsewhere, is not being considered for publication elsewhere and does not duplicate material already published. I confirm all authors consent to publication of this Work and authorise the granting of this licence.

[ここに入力]

1  
2  
3  
4 **Global Monitoring of Public Interest in Preventive Measures against COVID-19 via**  
5 **Analysis of Google Trends: An Infodemiology and Infoveillance Study**  
6  
7  
8  
9  
10

11  
12 **Tomoo Ito\***  
13

14 Bureau of International Health Cooperation, National Center for Global Health and Medicine, 1-  
15 21-1 Toyama Shinjuku-ku, Tokyo 162-8655, Japan  
16  
17

18  
19  
20 **\* Correspondence:**

21 Tomoo Ito

22 t-itot@it.ncgm.go.jp  
23  
24  
25

26 Word count: 4257  
27  
28  
29  
30  
31  
32  
33  
34  
35  
36  
37  
38  
39  
40  
41  
42  
43  
44  
45  
46  
47  
48  
49  
50  
51  
52  
53  
54  
55  
56  
57  
58  
59  
60

**Keywords:** COVID-19, infection control, preventive measures, public awareness, Google Trends, global health

## Abstract

**Introduction:** The coronavirus disease 2019 (COVID-19) pandemic has influenced people's concerns regarding infectious diseases and their preventive measures. However, the magnitude of the impact and the difference between countries are unclear. This study aimed to assess the magnitude of the impact of COVID-19 on public interest and people's behaviors globally in preventing infectious diseases while comparing international trends and sustainability.

**Methods:** The study employed an infodemiological and infoveillance approach to delineate public interest regarding COVID-19 preventive measures through web-based data and analysis using Google Trends. A relative search volume was assigned to a keyword, standardizing it from 0 to 100, with 100 representing the highest share of the term searches. The search terms "coronavirus," "wash hands," "social distancing," "hand sanitizer," and "mask" were investigated across 196 different countries and regions from July 2018 to October 2021 and obtained weekly reports of relative search volume. Persistence of interest was assessed by comparing the first 20 weeks with the last 20 weeks of the study period.

**Results:** Although the relative search volume of "coronavirus" increased and was sustained at a significantly higher value ( $p < 0.05$ ) globally than before the pandemic declaration, the trends and sustainability on the interest of preventable measures against COVID-19 varied between countries and regions.

**Conclusions:** The global differences should be taken into consideration for implementing effective interventions against COVID-19. The increased interest in preventive behaviors against COVID-19 may be related to overall infectious disease prevention.

## Article Summary

### Strengths and limitations of this study

This is the first study to use Google Trends to objectively show the trends in people's interest in COVID-19 and its preventive measures in countries and regions worldwide.

This study revealed the trends and sustainability on the interest of preventable measures against COVID-19 varied between countries and regions around the world.

The global differences should be taken into consideration for implementing effective interventions against COVID-19. The increased interest in preventive behaviors against COVID-19 may be related to overall infectious disease prevention.

This study had some limitations. First, the differences in internet availability may have affected the results. Second, the percentage of Google users may have affected the global-level evaluation of public interest using Google Trends.

## INTRODUCTION

The coronavirus disease 2019 (COVID-19) was first reported in Wuhan, China, in November 2019 and was declared a public health emergency of international concern on January 31, 2020. In March 11, 2020, it was declared a pandemic by the World Health Organization (WHO).[1] As of December 6, 2021, there have been 265,194,191 confirmed cases of COVID-19, including 5,254,116 deaths.[2] Considering its widespread relevance, the COVID-19 pandemic may impact people's interest in infectious diseases and their lifestyles.[3] Therefore, the interest in preventive measures against infectious diseases may be growing worldwide at a whole new level. However, the magnitude of the impact on people's preventive behavior is difficult to measure objectively, and the differences in behaviors among countries are unclear. Moreover, with the prolonged pandemic, it is uncertain whether the growing interest in preventive actions against infectious diseases can be sustained.

When faced with rapidly progressing infectious disease outbreaks, such as COVID-19, the assessment of population awareness on infection prevention behaviors needs to be accomplished promptly if the findings are informative in the context of the public health response. However, such an assessment is not an easy task. For instance, population-representative household surveys generally require several months of preparation and data collection; therefore, they do not always provide timely results. Such an effort could be aided using available web search query data, which provide insight into public interests related to such behaviors.

The use of internet search data to draw conclusions on the determinants and delivery of health information is known as infodemiology.[4, 5] Since the first reported use of search engine data to track the 2008 influenza epidemic,[6] several research publications related to behavioral change and public interest in health have utilized the same.[7–11] Google Trends is a web-based tool that analyzes a portion of daily Google searches, generating data on geographical and temporal patterns according to specified keywords. Previous studies showed an accurate prediction and forecasting of current public interests, which allowed for the analysis of various fields.[12–14]

This year, some researchers have investigated the impact of COVID-19 using Google Trends. Effenberger et al.[15] showed a relationship between the highest interest and the peak of newly confirmed cases. Also, Walker et al.[16] reported a correlation between symptom search terms and confirmed case growth. In addition, Sousa-Pinto et al. [17] reported the relationship between media coverage and COVID-19 keywords, whereas Heerfordt et al. [18] evaluated whether COVID-19 was associated with smoking cessation behaviors. Kutlu [19] reported the trends and impacts of dermatologic diseases on public perceptions during the COVID-19 pandemic, and Onchonga [20] reported on the use of the interest in self-medication during the COVID-19 pandemic.

However, the impact of the global COVID-19 pandemic on the long-term interest in preventive measures against infectious diseases has not been studied, and whether such interest can be sustained or is only temporary. Moreover, global differences in public interest regarding COVID-19 and preventive measures have not been objectively monitored.

1  
2  
3 The purpose of this study was to assess the magnitude of COVID-19's impact on public interest  
4 regarding preventive behaviors, by focusing on the pace at which public interest increased due to  
5 the COVID-19 pandemic, suitability of the interest, and types of preventive measures preferred by  
6 different countries.  
7  
8  
9

## 10 **MATERIALS AND METHODS**

11  
12  
13 Google Trends was used to quantify and measure changes in internet searches regarding the  
14 COVID-19 pandemic worldwide and in each country.  
15

### 16 **Google trends function**

17  
18 Google Trends uses a fraction of searches for a specific term (also known as “keyword” or “search  
19 term”) and then analyzes the number of Google searches according to a geographical location and  
20 defined timeframe. After the examined keyword(s) or topic(s), the region and the period are  
21 entered. The region can be a country, a region, or a combined data set of all regions (global). The  
22 popularity of a search term in a given week relative to other weeks in the mentioned time period  
23 within a geographic region is shown as relative search volume (RSV). The most popular week has  
24 an RSV of 100 and all other weeks are reported relative to the most popular week on a scale from  
25 0 to 99. For example, an RSV of 50 would indicate that search term was 50% as popular as it was  
26 in the most popular week. A score of 0 indicates that there are not enough searches to show for this  
27 term in the week. When a sufficient number of searches cannot be confirmed for a search keyword  
28 or topic in a specified country, the system displays that the data cannot be retrieved.  
29  
30  
31

32 For international comparisons among countries that use different languages, topic searches are  
33 useful. Topics are a group of terms that share the same concept in any language, and they are  
34 displayed below search terms. For example, when we search the topic "London," the search  
35 includes results for topics such as: "Capital of the UK" and "Londres," which is "London" in  
36 Spanish. This study used topic searches following keywords in 196 countries.  
37  
38

39 The data are retrieved directly from the Google Trends Explore page in .csv format. If the survey  
40 period is long, the values are displayed as weekly values.  
41

### 42 **Target country, search term selection, and study term**

43  
44 For 196 countries and regions around the world, Google Trend's “Topics” was used to show the  
45 RSVs of “coronavirus” and typical preventive behaviors, including “wash hand” and “social  
46 distancing,” and the supplies needed for prevention, such as “hand sanitizer” and “mask.” These  
47 topic terms were mentioned on the CDC site [21] as recommendations for prevention and were  
48 listed as related topics in Google Trend's coronavirus.  
49  
50

51 The specified survey period was set using the following procedures: First, the end of October 2021  
52 was set as the study's end period, and the most recent RSV was obtained on November 1, 2021.  
53 Second, the study's starting point was set from the same interval period between the WHO  
54 pandemic declaration and the study's end period. It was 85 weeks before and 85 weeks after the  
55  
56  
57

1  
2  
3 week of March 11, 2020. [1] Therefore, the date range was from the week of July 22, 2018, to that  
4 of October 24, 2021. Assessing the timing of raising interest of each topic term  
5

6 For each country's topic term, the week in which RSV exceeded 50 (RSV50) after the beginning  
7 of 2020 was defined as the timing of the rise in RSV in each country. In Google Trends, RSV50  
8 means 50% of search activity of the peak (RSV100) was performed in particular countries and  
9 regions using the defined term. Assessing the sustainability of people's interest  
10

11  
12 In this study, the sustainability of interest was assessed by comparing the last 20 weeks (from the  
13 week of June 13, 2021 to that of October 24, 2021) of the survey period with the first 20 weeks  
14 (from the week of July 22, 2018 to that of December 2, 2018) for each topic term. This was because  
15 all topics used in this study are terms that had been used prior to the COVID-19 pandemic; thus, if  
16 the RSV in the latter period, which was more than 1 year after the WHO pandemic declaration,  
17 was higher than the RSV in the period before the outbreak, the sustainability on public interest was  
18 presented regardless of its magnitude.  
19  
20

## 21 **Statistical analysis**

22  
23 The Mann–Whitney U test was used to compare the RSV during the first 20 weeks at the beginning  
24 of the study (from the week of July 22, 2018 to that of December 2, 2018) with the RSV during the  
25 last 20 weeks at the end of the study (from the week of June 13, 2021 to that of October 24, 2021)  
26 for each topic term. All statistical analyses were performed using SPSS version 25 (IBM, Armonk,  
27 NY, USA). All figures were created using Microsoft Excel (Microsoft Inc., Seattle, WA, USA).  $P$   
28  $< 0.05$  was considered statistically significant.  
29  
30

## 31 **Ethical considerations**

32  
33 The study did not require ethics approval because the RSVs obtained from Google Trends were  
34 publicly available, fully anonymized, and aggregated data.  
35

## 36 **Patient and public involvement**

37  
38 No patients and no public were involved in setting the research question or the outcome measures,  
39 nor were they involved in developing plans for design or implementation of the study. No patients  
40 and no public were asked to advise on interpretation or writing up of results. There are no plans to  
41 disseminate the results of the research to study participants or the relevant patient community.  
42  
43  
44  
45

## 46 **RESULTS**

### 47 **Global trends (Combined data set of all regions)**

48  
49 The search terms “coronavirus,” “wash hand,” “social distancing,” “hand sanitizer,” and “mask”  
50 reached RSV 50 by the week of the WHO pandemic declaration (March 11, 2020) in global trends  
51 (combined data set of all regions). Subsequently, “coronavirus,” “wash hand,” and “hand sanitizer”  
52 RSVs peaked (RSV100) in the week of the WHO pandemic declaration. This was followed by the  
53 RSV of “social distancing” a week later (the week of March 15, 2020), and that of “mask” 3 weeks  
54  
55  
56  
57  
58  
59  
60



1  
2  
3 later (the week of April 5, 2020) (Figure 1). In Global Trends, the RSVs of “coronavirus”, “wash  
4 hand”, “social distancing”, “hand sanitizer”, and “mask” were significantly higher ( $p<0.05$ ) in the  
5 last 20 weeks of the study period (from the week of June 13, 2021 to the week of October 24, 2021)  
6 than in the first 20 weeks before the pandemic declaration (from the week of July 22, 2018 to that  
7 of December 2, 2018).  
8  
9

### 10 **Search word “Coronavirus” trend**

11  
12 “Coronavirus” RSVs were obtained in 196 countries and territories. All of the target countries and  
13 regions had enough searches to show RSVs. In late January 2020, only eight countries (4.1%) in  
14 and mainly around China reached RSV50 (Bhutan, China, Laos, Macao, Mongolia, Philippines,  
15 Thailand, and Vietnam). However, in the week of the pandemic declaration (the week of March 8,  
16 2020), the number of countries that reached RSV50 rose sharply, especially in the Americas and  
17 Europe, and by late March, 85% of all the countries and regions, including African countries,  
18 reached RSV50. Japan, which was the only G7 country that did not initially have an  $RSV \geq 50$ , had  
19 an  $RSV \geq 50$  at this time. In early April, the RSV reached 50 in all targeted regions (Table 1, Figure  
20 2).  
21  
22

### 23 **Search word “Wash Hand” trend**

24  
25 A total of 192 countries and territories had “wash hand” RSVs, and four countries (Central Africa,  
26 Commonwealth of Dominica, Eritrea, and Turks and Caicos Islands) did not have enough searches  
27 to show RSVs. Six countries (3.1%) reached RSV50 in late January 2020 and included mostly  
28 Asian countries around China: Brunei, Vietnam, South Korea, Taiwan, Cambodia, and Singapore.  
29 Moreover, Bhutan, Cyprus, Syria, Antigua, and Barbuda were also above RSV50, but this was a  
30 temporary increase as it dropped to zero in the following week of late January 2020.  
31  
32

33  
34 In the week after the pandemic was declared (the week of March 8, 2020), 107 countries (54.6%),  
35 mainly in North America, Europe, and Asia, had  $RSVs \geq 50$ , and by late March, 160 countries  
36 (81.6%), including most countries in South America, had  $RSVs \geq 50$ . Japan, which was the only  
37 G7 country that did not have an  $RSV \geq 50$  in the week of March 8, 2020, had an  $RSV \geq 50$  at this  
38 time. Conversely, even in early April, the RSV did not exceed 50 in 21 countries (10.7%), including  
39 nine countries on the African continent (Algeria, Botswana, Burundi, Cameroon, Mozambique,  
40 Republic of Congo, Seychelles, Sudan, and Vanuatu) and countries in other areas (Table 1, Figure  
41 2).  
42  
43

### 44 **Search word “Social Distancing” trend**

45  
46 “Social distancing” RSVs were obtained in 174 countries and territories. There were 21 regions  
47 and countries that did not have enough searches to show RSVs.  
48

49  
50 Only 18 countries (9.2%) had an  $RSV \geq 50$ , even in the week when the pandemic was declared (the  
51 week March 8, 2020). In late March, 102 countries (52.0%), mainly in the Americas, Europe, and  
52 Asia, had an  $RSV \geq 50$ . In early April, 125 countries (65.3%) had an  $RSV \geq 50$ , but 49 countries  
53 (25.0%) in various regions, including two G7 countries (France, Italy) in Europe ( $n=7$ ), Asia and  
54 Oceania ( $n=10$ ), America ( $n=16$ ), and Africa ( $n=16$ ) did not have an  $RSV \geq 50$  (Table 1, Figure 2).  
55 The highest number countries did not reach an RSV of 50 and above with respect to the search  
56  
57  
58  
59  
60

1  
2  
3 term “social distancing” (n=49) by early April when compared with other study terms, such as  
4 “coronavirus” (n=0), “wash hand” (n=21), “hand sanitizer” (n=7), and “mask.” n=41).

### 6 **Search word “Hand Sanitizer” trend**

8 In 193 countries and territories, “hand sanitizer” RSVs were available, and in the three countries  
9 (Central Africa, Eritrea, and Liechtenstein), there were not enough searches to show RSVs.

11 In late January 2020, eight countries (4.1%), mainly those around China (Cambodia, China, Macao,  
12 Maldives, Singapore, South Korea, Taiwan, and Vietnam), had RSVs  $\geq 50$ , and in the week of the  
13 pandemic declaration, the number of countries with an RSV  $\geq 50$  increased to 121 (61.7%).  
14 Subsequently, the number of countries with an RSV  $\geq 50$  gradually increased to 187 (95.4%) in  
15 early April (Table 1, Figure 2). The countries with RSVs  $< 50$  by early April (Burundi,  
16 Commonwealth of Dominica, Liberia, New Caledonia, Suriname, Tajikistan, Turkmenistan) had  
17 reached an RSV of 50 at various later times.

### 21 **Search word “Mask” trend**

23 Valid “mask” RSVs were obtained for 195 countries and regions, and only one country (Eritrea)  
24 did not have enough searches to display an RSV. In late January 2020, 27 countries (13.8%) had  
25 an RSV  $\geq 50$ . They consisted mainly of countries around China (Cambodia, China, Japan, Lao  
26 PDR, Macao, Malaysia, Mongolia, Myanmar, Philippines, Singapore, South Korea, Taiwan,  
27 Thailand, and Vietnam) and some countries in other areas. In late March, there were 130 countries  
28 with an RSV  $\geq 50$ , in contrast, the United States and some European countries still did not have an  
29 RSV  $\geq 50$ . Then, in early April, 154 countries (78.6%) had an RSV  $\geq 50$ . Forty-one countries  
30 including many major European countries (Belgium, Finland, France, Germany, Ireland,  
31 Switzerland, and the United Kingdom), African countries, countries on the South American  
32 continent, Australia, and New Zealand did not reach RSV  $\geq 50$  by early April and had reached an  
33 RSV of 50 at various later times (Table 1, Figure 2).

### 37 **Comparison of RSV in $\geq 65$ weeks after the declaration of the pandemic and before the 38 COVID-19 pandemic**

40 In 191 countries, the RSV of “coronavirus” was significantly higher ( $p < 0.05$ ) in the last 20 weeks  
41 of this study term than in its first 20 weeks before the pandemic declaration. There were five  
42 countries (Central Africa, Djibouti, Eritrea, Liberia, and Samoa) that had no significant difference.

44 In 24 countries (12.2%), the RSV of “wash hand” was significantly higher ( $p < 0.05$ ) in the last 20  
45 weeks of this study term than in its first 20 weeks before the pandemic declaration. The majority  
46 of these countries were from Asia and Oceania (Australia, Bangladesh, India, Indonesia, Japan,  
47 Malaysia, Philippines, Singapore, South Korea, Taiwan, Thailand, and Vietnam), followed by  
48 those the Americas (Brazil, Chile, Colombia, Ecuador, Nicaragua, USA, and Venezuela), Europe  
49 (Netherlands and United Kingdom), and Africa (Kenya and South Africa).

52 The RSV for “social distancing” was significantly higher ( $p < 0.05$ ) in 41 countries (20.9%) in the  
53 last 20 weeks than in the first 20 weeks of this study before the pandemic declaration. It was  
54 widely distributed among 14 Asian and Oceania countries (Australia, Bangladesh, Fiji, India,  
55 Indonesia, Japan, Malaysia, New Zealand, Philippines, Singapore, South Korea, Taiwan,  
56

1  
2  
3 Thailand, and Vietnam), three Middle Eastern countries (Pakistan, Saudi Arabia, and the UAE)  
4 with the above and upper middle income, seven European countries (France, Germany, Ireland,  
5 Italy, Spain, Turkey, and the United Kingdom, 14 American countries (Argentina, Bolivia,  
6 Brazil, Canada, Chile, Colombia, Dominican Republic, Ecuador, Mexico, Panama, Paraguay,  
7 Peru, USA, and Venezuela), and three African countries (South Africa, South Sudan, and  
8 Zimbabwe).

9  
10  
11 In 74 countries (37.8%), “hand sanitizer” was a significantly higher RSV ( $p < 0.05$ ) in the last 20  
12 weeks of this study term than in the first 20 weeks before the pandemic declaration. The distribution  
13 of countries with statistical significance was widely distributed among 20 Asian and Oceania  
14 countries (Australia, Bangladesh, Brunei, Cambodia, China, India, Indonesia, Japan, Kazakhstan,  
15 Malaysia, Myanmar, Nepal, New Zealand, Philippines, Singapore, South Korea, Sri Lanka,  
16 Taiwan, Thailand, and Vietnam), eight Middle Eastern countries (Iran, Kuwait, Lebanon, Oman,  
17 Pakistan, Qatar, Saudi Arabia, and the UAE), 17 European countries (Belgium, Denmark, Finland,  
18 France, Georgia, Germany, Ireland, Italy, Netherlands, Norway, Poland, Portugal, Russia, Spain,  
19 Turkey, Ukraine, and the United Kingdom), 17 American countries (Argentina, Brazil, Canada,  
20 Chile, Colombia, Costa Rica, Dominican Republic, Ecuador, El Salvador, Mexico, Paraguay, Peru,  
21 Puerto Rico, Trinidad and Tobago, USA, Uruguay, and Venezuela), and 12 African countries  
22 (Algeria, Botswana, Ethiopia, Kenya, Libya, Mauritius, Morocco, Nigeria, South Africa, Tunisia,  
23 Uganda, and Zimbabwe).

24  
25  
26  
27 In 98 countries (50.0%), the RSV of “mask” was significantly higher ( $p < 0.05$ ) in the last 20 weeks  
28 of this study term than in its first 20 weeks before the pandemic declaration. This was a higher  
29 percentage than for any other prevention-related word. Those with significant differences in RSV  
30 included 34 European (Albania, Austria, Belarus, Belgium, Bulgaria, Croatia, Denmark, Estonia,  
31 Finland, France, Germany, Greece, Hungary, Iceland, Isle of Man, Ireland, Jersey, Kosovo, Latvia,  
32 Lithuania, Luxembourg, Malta, Moldova, Netherlands, Poland, Portugal, Romania, Russia,  
33 Slovenia, Spain, Switzerland, Turkey, Ukraine, and the United Kingdom), 16 American (Argentina,  
34 Bahamas, Barbados, Brazil, Canada, Cuba, Dominican Republic, Guam, Jamaica, Mexico,  
35 Panama, Sint Maarten, Saint Helena, Trinidad and Tobago, USA, and Venezuela), 19 Asian and  
36 Oceania (Australia, Bangladesh, Bhutan, Brunei, Cambodia, Fiji, India, Indonesia, Japan,  
37 Kazakhstan, Macao, Malaysia, Nepal, New Zealand, Philippines, Singapore, Sri Lanka, Taiwan,  
38 and Uzbekistan), 12 Middle Eastern (Afghanistan, Bahrain, Iran, Iraq, Israel, Kuwait, Oman,  
39 Pakistan, Qatar, Saudi Arabia, the UAE, and Yemen), and 17 African countries (Democratic  
40 Republic of the Congo, Egypt, Ethiopia, Ghana, Kenya, Mauritius, Morocco, Nigeria, Reunion,  
41 Rwanda, Senegal, Somalia, South Africa, Sudan, Uganda, Zambia, and Zimbabwe) (Figure 3).

## 42 43 44 45 46 47 **DISCUSSION**

48  
49 The COVID-19 pandemic has had a significant impact on global public awareness and behavior,  
50 including an increased interest in the prevention of infectious diseases. However, the magnitude of  
51 the impact and the differences among countries are unclear. To our knowledge, this is the first  
52 study to use Google Trends to objectively show the trends in people’s interest in COVID-19 and  
53 its preventive measures in countries and regions worldwide. As globalization progresses, it is  
54 necessary to consider countermeasures against globally transmitted infectious diseases, such as  
55  
56  
57

1  
2  
3 COVID-19, from a global perspective. Therefore, understanding the trends in people's interest in  
4 preventive measures is important to consider global countermeasures. We noted some interesting  
5 observations in the present situation of the global interest in COVID-19 and preventable measures.  
6

7  
8 First, the global interest in coronaviruses among people with COVID-19 has increased to an  
9 unprecedented level after WHO declared a pandemic in March 2020; [1] interest in "coronavirus"  
10 has been maintained to a certain extent even now, more than a year and a half after the outbreak.  
11 We also noted an increase of interest in preventable measures globally. However, the timings of  
12 the increase differed by country and region. Even though most countries also "reacted" to  
13 prevention measures at the timing of the WHO pandemic declaration, some countries increased  
14 interest in preventable measures much earlier than others. Geographical and political factors may  
15 have influenced the timing of the increase. For example, the countries around China, such as (e.g.,  
16 Vietnam), increased their public interest much before the WHO's pandemic declaration, when  
17 Chinese travelers were banned from the country at a very early phase. [22] Contrastingly, in Japan,  
18 the interest in "coronavirus" and preventable measures peaked much later than in other high-  
19 income countries after the WHO pandemic declaration; it was when a state of emergency was first  
20 declared by the Japanese government on April 7, 2020.  
21  
22

23  
24 We focused on not only the "increase" in awareness but also how to sustain the interest in measures  
25 for preventing infectious diseases. We found that, in most countries and regions, people's interest  
26 in COVID-19 and preventive measures increased, but the persistence of interest in these  
27 preventable measures was not necessarily maintained; there was also a difference in the  
28 sustainability level of interest by country and region. Furthermore, with these differences in each  
29 country's characteristics, there are also differences in sustainability between the search words  
30 "wash hand," "social distancing," "hand sanitizer", and "mask".  
31

32  
33 The sustainability of people's interest in masks was confirmed in a wide range of countries and  
34 regions than other search terms. At the beginning of the outbreak, interest in masks spread mainly  
35 in Asian countries relatively quickly, where a mask culture was already present. A report showed  
36 the regional difference of wearing masks by region at an early stage of the COVID-19 pandemic.  
37 [23] This might be attributed to the geographic differences and the cultural differences that could  
38 have enhanced self-protecting habits. [24] However, notably, the sustainability of the other word  
39 "impact" of "masks" was confirmed in many countries that are not necessarily familiar with the  
40 practice of wearing of masks during winter, such as many Western countries. [25] This implies that  
41 familiarity with masks may spread in countries without a mask-wearing culture. Although the  
42 effectiveness of facemask use in community settings for COVID-19 prevention has been  
43 controversial, [26–28] the COVID-19 pandemic introduced a "new culture" to these countries and  
44 regions.  
45  
46

47  
48 Contrastingly, countries that were able to sustain interest in the search term "wash hand" were  
49 relatively limited. Notably, the impact of COVID-19 was confirmed in relatively few European  
50 countries with low sustainable interest for the term "wash hand", where the cumulative number of  
51 confirmed cases was high. [2] The impact was concentrated in Southeast and East Asian countries,  
52 where the number of confirmed cases and death rates were relatively low. [2] This suggests that  
53 for the countries that did not sustain the interest of "wash hand," including many European  
54 countries, interventions to maintain public interest may be necessary in cases of repeated outbreaks.  
55  
56  
57

As governments consider effective ways to control infections, they need to consider the fact that they may not be able to sustain the population's interest in preventive actions against infection.

Countries in East and Southeast Asia maintained an interest in “wash hand” and in other preventable measures such as “social distancing” and “hand sanitizer”. Thus, in these regions, the COVID-19 pandemic had a great impact on the public mind's interest and awareness of prevention measures against infectious diseases. Since prevention methods are common to many infectious diseases, the increased awareness of people regarding the prevention measures due to the COVID-19 pandemic can be expected to be reflected in future COVID-19 trends and in the decrease in other infectious diseases. Some previous studies in East Asia reported that the number of seasonal influenza cases in the 2019–2020 season was lower after COVID-19 transmission than in previous years and suggested the positive effects of prevention measures against COVID-19 on seasonal influenza. [29–31] The National Institute of Infectious Diseases in Japan also reported that in 2020 and 2021, mycoplasma pneumonia, respiratory syncytial virus infection, and Group A streptococcal pharyngitis decreased, whereas infectious gastroenteritis significantly decreased and reached its lowest level in a decade. [32] These infections can be effectively prevented by washing hands, social distancing, using hand sanitizers, and wearing masks as discussed in this study. In combination with these trends and the results from this study, it is suggested that the increasing interest in preventive actions in East Asian countries may be associated with the decrease in other infectious diseases.

The other main finding of the difference between the regions is the slower pace of development of interest in countries on the African continent as well as the limited areas where the persistence of interest had been observed, especially in terms that were related to behavior change, such as “wash hand” and “social distancing”. When we interpret data about African countries, it is necessary to consider the level of internet availability because African countries have relatively low internet availability. [33] However, considering that the trend of increased and sustained interest in “coronavirus” was confirmed even in African countries at the same level as other regions, the general interest in preventive measures in the African continent can be evaluated as being relatively lower. Thus, the data can be used as a reference for understanding the present situation in Africa. Some studies also mentioned the issues in attitude toward knowledge and healthy practices, including COVID-19 preventive practices in African countries. [34–36] The low-level interest in preventive measures in African countries needs to be considered in future strategies for expanding preventive measures against infectious disease at the global level. As the pandemic is still unfolding, there is a strong need to continually implement measures such as health promotions to better understand the pandemic and related health behaviors in the African population and the countries with low impact on public interest for preventable measures.

This study had some limitations. First, the differences in internet availability may have affected the results. Second, the percentage of Google users may have affected the global-level evaluation of public interest using Google Trends. For example, a typical case is that Google's share as a web search engine in China is very low because they may have used other search engines and hence, did not use Google. [37] Therefore, Google Trends is not a suitable tool for understanding trends in countries such as China; the results of these countries should be interpreted with this prior knowledge in mind.

## CONCLUSION

1  
2  
3 The COVID-19 pandemic may have impacted the global public interest of prevention measures  
4 against infectious diseases. However, there are differences in interest related to preventable  
5 measures and sustainability of that interest between countries and regions. The increased interest  
6 in preventive behaviors against COVID-19 may be related to overall infectious disease prevention.  
7 These global differences should be considered when implementing effective interventions against  
8 infectious diseases at the global level.  
9

### 10 11 12 13 14 15 16 17 **Competing Interests**

18  
19 The authors declare that the research was conducted in the absence of any commercial or financial  
20 relationships that could be construed as a potential conflict of interest.  
21

### 22 23 **Author Contributions**

24  
25 Tomoo Ito was involved in the study design, data analysis, interpretation, and creation of  
26 tables and figures, and wrote the final report.  
27

### 28 29 **Funding**

30 This research did not receive any specific grant from funding agencies in the public, commercial,  
31 or not-for-profit sectors.  
32

### 33 34 **Acknowledgments**

35 All work on this paper was done by Tomoo Ito alone, and there were no other collaborators on this  
36 paper.  
37

### 38 39 **Data Availability Statement**

40 The data that support the findings of this study are available from the author upon reasonable  
41 request.  
42

### 43 44 **References**

- 45  
46 1 World Health Organization WHO, director. [http://www.who.int/dg/speeches/detail/who-](http://www.who.int/dg/speeches/detail/who-director-general-s-opening-remarks-at-the-media-briefing-on-covid-19---11-march-2020)  
47 [director-general-s-opening-remarks-at-the-media-briefing-on-covid-19---11-march-2020](http://www.who.int/dg/speeches/detail/who-director-general-s-opening-remarks-at-the-media-briefing-on-covid-19---11-march-2020)  
48 (Accessed Nov 1, 2021). *General's opening remarks at the media briefing on COVID-19*.  
49  
50 2 World Health Organization. WHO coronavirus disease (COVID-19) Dashboard [Internet].  
51 <https://covid19.who.int> (Accessed Nov 1, 2021).  
52  
53 3 Xiang M, Zhang Z, Kuwahara K. Impact of COVID-19 pandemic on children and  
54 adolescents' lifestyle behavior larger than expected. *Prog Cardiovasc Dis* 2020;63:531–2.  
55 DOI: [10.1016/j.pcad.2020.04.013](https://doi.org/10.1016/j.pcad.2020.04.013).  
56  
57  
58  
59  
60

- 1  
2  
3 4 Eysenbach G. Infodemiology and infoveillance: Framework for an emerging set of public  
4 health informatics methods to analyze search, communication and publication behavior on the  
5 Internet. *J Med Internet Res* 2009;11:e11. DOI: [10.2196/jmir.1157](https://doi.org/10.2196/jmir.1157), PMID:[19329408](https://pubmed.ncbi.nlm.nih.gov/19329408/).  
6  
7  
8 5 Eysenbach G. Infodemiology and infoveillance tracking online health information and  
9 cyber behavior for public health. *Am J Prev Med* 2011;40(5);Supplement 2:S154–8. DOI:  
10 [10.1016/j.amepre.2011.02.006](https://doi.org/10.1016/j.amepre.2011.02.006).  
11  
12 6 Pervaiz F, Pervaiz M, Abdur Rehman N et al. FluBreaks: Early epidemic detection from  
13 Google flu trends. *J Med Internet Res* 2012;14:e125. DOI: [10.2196/jmir.2102](https://doi.org/10.2196/jmir.2102).  
14  
15 7 Mavragani A, Ochoa G, Tsagarakis KP. Assessing the methods, tools, and statistical  
16 approaches in Google Trends research: Systematic review. *J Med Internet Res* 2018;20:e270.  
17 DOI: [10.2196/jmir.9366](https://doi.org/10.2196/jmir.9366).  
18  
19 8 Nuti SV, Wayda B, Ranasinghe I et al. The use of Google Trends in health care research:  
20 A systematic review. *PLOS ONE* 2014;9:e109583. DOI: [10.1371/journal.pone.0109583](https://doi.org/10.1371/journal.pone.0109583).  
21  
22 9 Alicino C, Bragazzi NL, Faccio V et al. Assessing Ebola-related web search behaviour:  
23 Insights and implications from an analytical study of Google Trends-based query volumes.  
24 *Infect Dis Pover* 2015;4:54. DOI: [10.1186/s40249-015-0090-9](https://doi.org/10.1186/s40249-015-0090-9).  
25  
26 10 Lin YH, Liu CH, Chiu YC. Google searches for the keywords of “wash hands” predict the  
27 speed of national spread of COVID-19 outbreak among 21 countries. *Brain Behav Immun*  
28 2020;87:30–2. DOI: [10.1016/j.bbi.2020.04.020](https://doi.org/10.1016/j.bbi.2020.04.020).  
29  
30 11 Cervellin G, Comelli I, Lippi G. Is Google Trends a reliable tool for digital epidemiology?  
31 Insights from different clinical settings. *J Epidemiol Glob Health* 2017;7:185–9. DOI:  
32 [10.1016/j.jegh.2017.06.001](https://doi.org/10.1016/j.jegh.2017.06.001).  
33  
34 12 Scharnow M, Vogelgesang J. Measuring the public agenda using search engine queries. *Int*  
35 *J Public Opin Res* 2011;23:104–13. DOI:[10.1093/ijpor/edq048](https://doi.org/10.1093/ijpor/edq048).  
36  
37 13 Choi H, Varian H. Predicting the present with Google Trends. *Econ Rec* 2012;88:2–9. DOI:  
38 [10.1111/j.1475-4932.2012.00809.x](https://doi.org/10.1111/j.1475-4932.2012.00809.x).  
39  
40 14 Stein JD, Childers DM, Nan B et al. Gauging interest of the general public in laser-assisted  
41 in situ keratomileusis eye surgery. *Cornea* 2013;32:1015–8. DOI:  
42 [10.1097/ICO.0b013e318283c85a](https://doi.org/10.1097/ICO.0b013e318283c85a).  
43  
44 15 Effenberger M, Kronbichler A, Shin JI et al. Association of the COVID-19 pandemic with  
45 internet search volumes: A Google Trends™ analysis. *Int J Infect Dis* 2020;95:192–7.  
46 DOI:[10.1016/j.ijid.2020.04.033](https://doi.org/10.1016/j.ijid.2020.04.033).  
47  
48 16 Walker A, Hopkins C, Surda P. Use of Google Trends to investigate loss-of-smell-related  
49 searches during the COVID-19 outbreak. *Int Forum Allergy Rhinol* 2020;10:839–47. DOI:  
50 [10.1002/alr.22580](https://doi.org/10.1002/alr.22580).  
51  
52  
53  
54  
55  
56  
57  
58  
59  
60

17 Sousa-Pinto B, Anto A, Czarlewski W et al. Assessment of the impact of media coverage on COVID-19-related Google Trends data: Infodemiology study. *J Med Internet Res* 2020;22:e19611. DOI: [10.2196/19611](https://doi.org/10.2196/19611).

18 Heerfordt C, Heerfordt IM. Has there been an increased interest in smoking cessation during the first months of the COVID-19 pandemic? A Google Trends study. *Public Health* 2020 June;183:6–7. DOI: [10.1016/j.puhe.2020.04.012](https://doi.org/10.1016/j.puhe.2020.04.012).

19 Kutlu Ö. Analysis of dermatologic conditions in Turkey and Italy by using Google Trends analysis in the era of the COVID-19 pandemic. *Dermatol Ther* 2020;33:e13949. DOI:[10.1111/dth.13949](https://doi.org/10.1111/dth.13949).

20 Onchonga D. A Google Trends study on the interest in self-medication during the 2019 novel coronavirus (COVID-19) disease pandemic. *Saudi Pharm J* 2020;28:903–4. DOI:[10.1016/j.jsps.2020.06.007](https://doi.org/10.1016/j.jsps.2020.06.007).

21 Yourself & others. How to protect. <https://www.cdc.gov/coronavirus/2019-ncov/prevent-getting-sick/prevention.html> (Accessed Nov 1, 2021). CDC Center for Disease and Prevention [Internet].

22 Huynh TLD. The COVID-19 containment in Vietnam: What are we doing? *J Glob Health* 2020;10:010338. DOI:[10.7189/jogh.10.010338](https://doi.org/10.7189/jogh.10.010338).

23 Elachola H, Ebrahim SH, Gozzer E. COVID-19: Facemask use prevalence in international airports in Asia, Europe and the Americas, March 2020. *Travel Med Infect Dis* 2020;35:101637. DOI:[10.1016/j.tmaid.2020.101637](https://doi.org/10.1016/j.tmaid.2020.101637).

24 Siu JY. Qualitative study on the shifting sociocultural meanings of the facemask in Hong Kong since the severe acute respiratory syndrome (SARS) outbreak: Implications for infection control in the post-SARS era. *Int J Equity Health* 2016;15:73. DOI: [10.1186/s12939-016-0358-0](https://doi.org/10.1186/s12939-016-0358-0).

25 Onishi N, Méheut C. Mask-wearing is a very new fashion in Paris (and a lot of other Places). *New York Times*. <http://www.nytimes.com/2020/04/09/world/europe/hevirus-mask-wearing.html> [Internet].

26 World Health Organization. Advice on the use of masks in the community, during home care and in health care settings in the context of the novel coronavirus. nCoV outbreak: Interim guidance. <https://apps.who.int/iris/handle/10665/330987> (Accessed Dec 5, 2021).

27 Leung CC, Lam TH, Cheng KK. Mass masking in the COVID-19 epidemic: People need guidance. *Lancet* 2020;395:945. DOI: [10.1016/S0140-6736\(20\)30520-1](https://doi.org/10.1016/S0140-6736(20)30520-1).

28 van der Sande M, Teunis P, Sabel R. Professional and home-made face masks reduce exposure to respiratory infections among the general population. *PLOS ONE* 2008;3:e2618. DOI: [10.1371/journal.pone.0002618](https://doi.org/10.1371/journal.pone.0002618).



1  
2  
3 29 Itaya T, Furuse Y, Jindai K. Does COVID-19 infection impact on the trend of seasonal  
4 influenza infection? 11 Countries and regions, from 2014 to 2020. *Int J Infect Dis* 2020;97:78–  
5 80. DOI: [10.1016/j.ijid.2020.05.088](https://doi.org/10.1016/j.ijid.2020.05.088).

6  
7  
8 30 Lee H, Lee H, Song KH et al. Impact of public health interventions on seasonal influenza  
9 activity during the COVID-19 outbreak in Korea. *Clin Infect Dis* 2021;73:e132–40. DOI:  
10 [10.1093/cid/ciaa672](https://doi.org/10.1093/cid/ciaa672).

11  
12 31 Huang QS, Wood T, Jelley L, et al. Impact of the COVID-19 nonpharmaceutical  
13 interventions on influenza and other respiratory viral infections in New Zealand. *Nat Commun*  
14 2021;12:1001. DOI: [10.1038/s41467-021-21157-9](https://doi.org/10.1038/s41467-021-21157-9).

15  
16 32 National Institutes of infectious disease, infectious disease weekly report Japan [Internet].  
17 <https://www.niid.go.jp/niid/ja/10/weeklygraph.html> (Accessed Dec 5, 2021).

18  
19 33 Share of internet users in Africa as of December 2020, by country.  
20 <https://www.statista.com/statistics/1124283/internet-penetration-in-africa-by-country/>  
21 (Accessed Nov 1, 2021). Statista [Internet].

22  
23 34 Odeyemi OA, Sani NA, Obadina AO et al. Food safety knowledge, attitudes and practices  
24 among consumers in developing countries: An international survey. *Food Res Int*  
25 2019;116:1386–90. DOI: [10.1016/j.foodres.2018.10.030](https://doi.org/10.1016/j.foodres.2018.10.030).

26  
27 35 Habib MA, Dayyab FM, Iliyasu G et al. Knowledge, attitude and practice survey of  
28 COVID-19 pandemic in Northern Nigeria. *PLOS ONE* 2021;16:e0245176. DOI:  
29 [10.1371/journal.pone.0245176](https://doi.org/10.1371/journal.pone.0245176).

30  
31 36 Workneh F, Wang D, Millogo O, et al. Knowledge and practice related to COVID-19 and  
32 mental health among adults in sub-Saharan Africa. *Am J Trop Med Hyg* 2021;105:351–62.  
33 DOI:[10.4269/ajtmh.21-0219](https://doi.org/10.4269/ajtmh.21-0219).

34  
35 37 Search engine market share China. Statcounter.

36  
37 (November 1, 2021) November 2020–. [https://gs.statcounter.com/search-engine-market-](https://gs.statcounter.com/search-engine-market-share/all/chinahttps)  
38 [share/all/chinahttps](https://gs.statcounter.com/search-engine-market-share/all/chinahttps) (Accessed Nov 2021);[http://www. http://www.nbcnews.com/technology/microsoft-](http://www.nbcnews.com/technology/microsoft-blocks-censorship-skype-china-advocacy-group-2D11664965)  
39 [blocks-censorship-skype-china-advocacy-group-2D11664965](http://www.nbcnews.com/technology/microsoft-blocks-censorship-skype-china-advocacy-group-2D11664965) (Accessed Nov 1, 2021).

## Tables

**Table 1. Number of countries with an RSV  $\geq 50$**

|                                                        | Week of<br>January 26,<br>2020 | Week of<br>February 23,<br>2020 | Week of<br>March 8, 2020 | Week of<br>March 22,<br>2020 | Week of<br>April 5,<br>2020 |
|--------------------------------------------------------|--------------------------------|---------------------------------|--------------------------|------------------------------|-----------------------------|
| RSV “coronavirus”                                      |                                |                                 |                          |                              |                             |
| Number of<br>countries with<br>RSV > 50, N<br>(%)      | 8 (4.1%)                       | 18 (9.2%)                       | 118 (60.2%)              | 189 (86.4%)                  | 196<br>(100%)               |
| Number of<br>countries<br>without valid<br>data, N (%) | 0 (0%)                         | 0 (0%)                          | 0 (0%)                   | 0 (0%)                       | 0 (0%)                      |
| RSV “wash hands”                                       |                                |                                 |                          |                              |                             |
| Number of<br>countries<br>with RSV $\geq$<br>50, N (%) | 10 (5.1%)                      | 37 (19.9%)                      | 107<br>(54.7%)           | 160<br>(81.6%)               | 171<br>(87.1%)              |
| Number of<br>countries<br>without valid<br>data, N (%) | 4 (2.0%)                       | 4 (2.0%)                        | 4 (2.0%)                 | 4 (2.0%)                     | 4 (2.0%)                    |
| RSV “social distancing”                                |                                |                                 |                          |                              |                             |
| Number of<br>countries<br>with RSV $\geq$<br>50, N (%) | 0 (0.0%)                       | 0 (0.0%)                        | 19 (9.2%)                | 102<br>(52.8%)               | 125<br>(62.6%)              |
| Number of<br>countries<br>without valid<br>data, N (%) | 22 (11.2%)                     | 22 (11.2%)                      | 22 (11.2%)               | 22 (11.2%)                   | 22<br>(11.2%)               |
| RSV “hand sanitizer”                                   |                                |                                 |                          |                              |                             |
| Number of<br>countries<br>with RSV $\geq$<br>50, N (%) | 8 (4.1%)                       | 24 (12.2%)                      | 121<br>(61.4%)           | 186<br>(94.4%)               | 187<br>(94.9%)              |
| Number of<br>countries                                 | 3 (1.5%)                       | 3 (1.5%)                        | 3 (1.5%)                 | 3 (1.5%)                     | 4 (1.5%)                    |

|                                               |            |            |            |             |             |
|-----------------------------------------------|------------|------------|------------|-------------|-------------|
| without valid data, N (%)                     |            |            |            |             |             |
| RSV "Masks"                                   |            |            |            |             |             |
| Number of countries with RSV $\geq$ 50, N (%) | 27 (13.8%) | 65 (33.2%) | 77 (39.3%) | 130 (66.3%) | 154 (83.4%) |
| Number of countries without valid data, N (%) | 1 (0.5%)   | 1 (0.5%)   | 1 (0.5%)   | 1 (0.5%)    | 1 (0.5%)    |

### Figure captions

**Fig 1.** RSV of "coronavirus," "wash hand", "social distancing", "hand sanitizer", and "mask" in the combined data for all countries and regions.

Horizontal axis: depicts the time period. The week of March 11, 2020, when WHO declared a pandemic, is set to 0 and increases hence. The weeks following the week of the pandemic declaration are numbered 1, 2, 3, and so on, until the 85th week (85 depicts the 85th week). The week before the pandemic declaration (0) is numbered -1 for the week one week before, -2 for the week two weeks before, and so on, until the 85th week (-85 means 85 weeks before the declaration of the pandemic).

Vertical axis: RSV value

**Fig 2.** Distribution trend of countries with "coronavirus" "wash hand" "social distancing" "hand sanitizer" and "mask" RSV  $\geq$ 50 after the COVID-19 outbreak

Area colored orange: countries with RSV "coronavirus"  $\geq$ 50

Area colored blue: countries without "coronavirus"  $\geq$ 50

Area colored gray: countries without valid data

**Fig 3.** Distribution of countries with statistically significant RSV of "coronavirus", "wash hand", "social distancing", "hand sanitizer", and "mask" in the last 20 weeks compared with that before the COVID-19 pandemic.

Area colored red: countries with statistical significance in the last 19 weeks versus before the COVID-19 pandemic.

Area colored white: countries without statistical significance in the last 19 weeks versus before the COVID-19 pandemic.

Area colored gray: countries without valid data

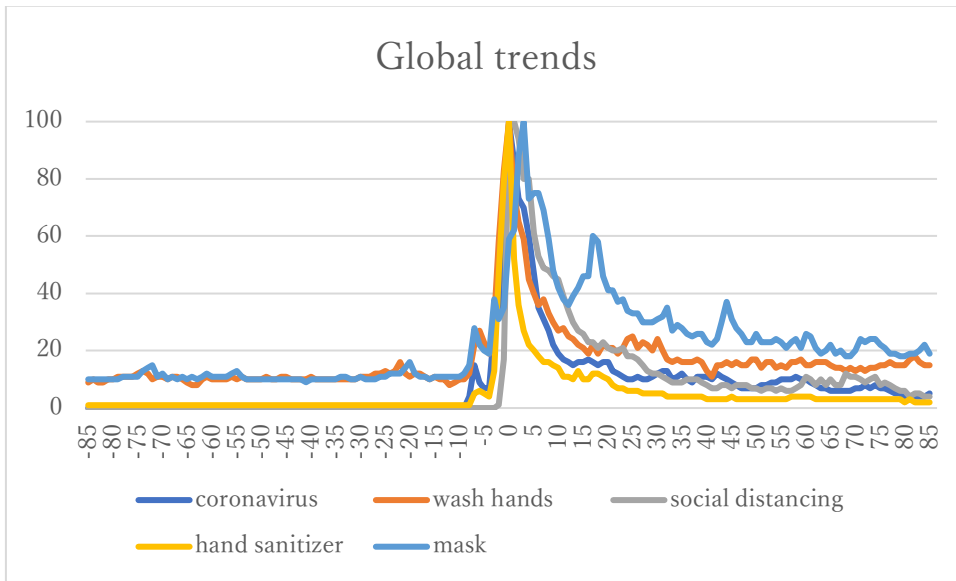

peer review only

## STROBE Statement—checklist of items that should be included in reports of observational studies

|                              | Item No | Recommendation                                                                                                                                                                                                                                                                                                                                                                                                                                                         | Page No  |
|------------------------------|---------|------------------------------------------------------------------------------------------------------------------------------------------------------------------------------------------------------------------------------------------------------------------------------------------------------------------------------------------------------------------------------------------------------------------------------------------------------------------------|----------|
| <b>Title and abstract</b>    | 1       | (a) Indicate the study's design with a commonly used term in the title or the abstract                                                                                                                                                                                                                                                                                                                                                                                 | P1<br>P2 |
|                              |         | (b) Provide in the abstract an informative and balanced summary of what was done and what was found                                                                                                                                                                                                                                                                                                                                                                    | P2       |
| <b>Introduction</b>          |         |                                                                                                                                                                                                                                                                                                                                                                                                                                                                        |          |
| Background/rationale         | 2       | Explain the scientific background and rationale for the investigation being reported                                                                                                                                                                                                                                                                                                                                                                                   | P3-4     |
| Objectives                   | 3       | State specific objectives, including any prespecified hypotheses                                                                                                                                                                                                                                                                                                                                                                                                       | P3-4     |
| <b>Methods</b>               |         |                                                                                                                                                                                                                                                                                                                                                                                                                                                                        |          |
| Study design                 | 4       | Present key elements of study design early in the paper                                                                                                                                                                                                                                                                                                                                                                                                                | P4-5     |
| Setting                      | 5       | Describe the setting, locations, and relevant dates, including periods of recruitment, exposure, follow-up, and data collection                                                                                                                                                                                                                                                                                                                                        | P4-5     |
| Participants                 | 6       | (a) <i>Cohort study</i> —Give the eligibility criteria, and the sources and methods of selection of participants. Describe methods of follow-up<br><i>Case-control study</i> —Give the eligibility criteria, and the sources and methods of case ascertainment and control selection. Give the rationale for the choice of cases and controls<br><i>Cross-sectional study</i> —Give the eligibility criteria, and the sources and methods of selection of participants | P4-5     |
|                              |         | (b) <i>Cohort study</i> —For matched studies, give matching criteria and number of exposed and unexposed<br><i>Case-control study</i> —For matched studies, give matching criteria and the number of controls per case                                                                                                                                                                                                                                                 | N/A      |
| Variables                    | 7       | Clearly define all outcomes, exposures, predictors, potential confounders, and effect modifiers. Give diagnostic criteria, if applicable                                                                                                                                                                                                                                                                                                                               | P4-5     |
| Data sources/<br>measurement | 8*      | For each variable of interest, give sources of data and details of methods of assessment (measurement). Describe comparability of assessment methods if there is more than one group                                                                                                                                                                                                                                                                                   | P4-5     |
| Bias                         | 9       | Describe any efforts to address potential sources of bias                                                                                                                                                                                                                                                                                                                                                                                                              | P4-5     |
| Study size                   | 10      | Explain how the study size was arrived at                                                                                                                                                                                                                                                                                                                                                                                                                              | P4-5     |
| Quantitative variables       | 11      | Explain how quantitative variables were handled in the analyses. If applicable, describe which groupings were chosen and why                                                                                                                                                                                                                                                                                                                                           | P4-5     |
| Statistical methods          | 12      | (a) Describe all statistical methods, including those used to control for confounding                                                                                                                                                                                                                                                                                                                                                                                  | P4-5     |
|                              |         | (b) Describe any methods used to examine subgroups and interactions                                                                                                                                                                                                                                                                                                                                                                                                    | P4-5     |
|                              |         | (c) Explain how missing data were addressed                                                                                                                                                                                                                                                                                                                                                                                                                            | P4-5     |
|                              |         | (d) <i>Cohort study</i> —If applicable, explain how loss to follow-up was addressed<br><i>Case-control study</i> —If applicable, explain how matching of cases and controls was addressed<br><i>Cross-sectional study</i> —If applicable, describe analytical methods taking account of sampling strategy                                                                                                                                                              | P4-5     |
|                              |         | (e) Describe any sensitivity analyses                                                                                                                                                                                                                                                                                                                                                                                                                                  | N/A      |

Continued on next page

| <b>Results</b>           |     |                                                                                                                                                                                                              |       |
|--------------------------|-----|--------------------------------------------------------------------------------------------------------------------------------------------------------------------------------------------------------------|-------|
| Participants             | 13* | (a) Report numbers of individuals at each stage of study—eg numbers potentially eligible, examined for eligibility, confirmed eligible, included in the study, completing follow-up, and analysed            | P4-5  |
|                          |     | (b) Give reasons for non-participation at each stage                                                                                                                                                         | P4-5  |
|                          |     | (c) Consider use of a flow diagram                                                                                                                                                                           | P4-5  |
| Descriptive data         | 14* | (a) Give characteristics of study participants (eg demographic, clinical, social) and information on exposures and potential confounders                                                                     | P4-5  |
|                          |     | (b) Indicate number of participants with missing data for each variable of interest                                                                                                                          | P4-5  |
|                          |     | (c) <i>Cohort study</i> —Summarise follow-up time (eg, average and total amount)                                                                                                                             | N/A   |
| Outcome data             | 15* | <i>Cohort study</i> —Report numbers of outcome events or summary measures over time                                                                                                                          | N/A   |
|                          |     | <i>Case-control study</i> —Report numbers in each exposure category, or summary measures of exposure                                                                                                         | N/A   |
|                          |     | <i>Cross-sectional study</i> —Report numbers of outcome events or summary measures                                                                                                                           | P5-8  |
| Main results             | 16  | (a) Give unadjusted estimates and, if applicable, confounder-adjusted estimates and their precision (eg, 95% confidence interval). Make clear which confounders were adjusted for and why they were included | P5-8  |
|                          |     | (b) Report category boundaries when continuous variables were categorized                                                                                                                                    | P5-8  |
|                          |     | (c) If relevant, consider translating estimates of relative risk into absolute risk for a meaningful time period                                                                                             | N/A   |
| Other analyses           | 17  | Report other analyses done—eg analyses of subgroups and interactions, and sensitivity analyses                                                                                                               | P5-8  |
| <b>Discussion</b>        |     |                                                                                                                                                                                                              |       |
| Key results              | 18  | Summarise key results with reference to study objectives                                                                                                                                                     | P8    |
| Limitations              | 19  | Discuss limitations of the study, taking into account sources of potential bias or imprecision. Discuss both direction and magnitude of any potential bias                                                   | P10   |
| Interpretation           | 20  | Give a cautious overall interpretation of results considering objectives, limitations, multiplicity of analyses, results from similar studies, and other relevant evidence                                   | P8-10 |
| Generalisability         | 21  | Discuss the generalisability (external validity) of the study results                                                                                                                                        | P8-10 |
| <b>Other information</b> |     |                                                                                                                                                                                                              |       |
| Funding                  | 22  | Give the source of funding and the role of the funders for the present study and, if applicable, for the original study on which the present article is based                                                | P11   |

\*Give information separately for cases and controls in case-control studies and, if applicable, for exposed and unexposed groups in cohort and cross-sectional studies.

**Note:** An Explanation and Elaboration article discusses each checklist item and gives methodological background and published examples of transparent reporting. The STROBE checklist is best used in conjunction with this article (freely available on the Web sites of PLoS Medicine at <http://www.plosmedicine.org/>, Annals of Internal Medicine at <http://www.annals.org/>, and Epidemiology at <http://www.epidem.com/>). Information on the STROBE Initiative is available at [www.strobe-statement.org](http://www.strobe-statement.org).

# BMJ Open

## Global Monitoring of Public Interest in Preventive Measures against COVID-19 via Analysis of Google Trends: An Infodemiology and Infoveillance Study

|                                 |                                                                                                                                                     |
|---------------------------------|-----------------------------------------------------------------------------------------------------------------------------------------------------|
| Journal:                        | <i>BMJ Open</i>                                                                                                                                     |
| Manuscript ID                   | bmjopen-2021-060715.R1                                                                                                                              |
| Article Type:                   | Original research                                                                                                                                   |
| Date Submitted by the Author:   | 26-May-2022                                                                                                                                         |
| Complete List of Authors:       | ITO, TOMOO; National Center for Global Health and Medicine                                                                                          |
| <b>Primary Subject Heading</b>: | Global health                                                                                                                                       |
| Secondary Subject Heading:      | Public health                                                                                                                                       |
| Keywords:                       | COVID-19, Health policy < HEALTH SERVICES ADMINISTRATION & MANAGEMENT, Infection control < INFECTIOUS DISEASES, Public health < INFECTIOUS DISEASES |
|                                 |                                                                                                                                                     |

SCHOLARONE™  
Manuscripts

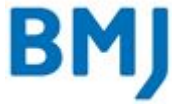

I, the Submitting Author has the right to grant and does grant on behalf of all authors of the Work (as defined in the below author licence), an exclusive licence and/or a non-exclusive licence for contributions from authors who are: i) UK Crown employees; ii) where BMJ has agreed a CC-BY licence shall apply, and/or iii) in accordance with the terms applicable for US Federal Government officers or employees acting as part of their official duties; on a worldwide, perpetual, irrevocable, royalty-free basis to BMJ Publishing Group Ltd ("BMJ") its licensees and where the relevant Journal is co-owned by BMJ to the co-owners of the Journal, to publish the Work in this journal and any other BMJ products and to exploit all rights, as set out in our [licence](#).

The Submitting Author accepts and understands that any supply made under these terms is made by BMJ to the Submitting Author unless you are acting as an employee on behalf of your employer or a postgraduate student of an affiliated institution which is paying any applicable article publishing charge ("APC") for Open Access articles. Where the Submitting Author wishes to make the Work available on an Open Access basis (and intends to pay the relevant APC), the terms of reuse of such Open Access shall be governed by a Creative Commons licence – details of these licences and which [Creative Commons](#) licence will apply to this Work are set out in our licence referred to above.

Other than as permitted in any relevant BMJ Author's Self Archiving Policies, I confirm this Work has not been accepted for publication elsewhere, is not being considered for publication elsewhere and does not duplicate material already published. I confirm all authors consent to publication of this Work and authorise the granting of this licence.



[ここに入力]

1  
2  
3  
4 1 **Global Monitoring of Public Interest in Preventive Measures against COVID-19 via**  
5  
6 2 **Analysis of Google Trends: An Infodemiology and Infoveillance Study**  
7  
8  
9

10 3

11  
12  
13 4

14  
15  
16 5 **Tomoo Ito\***

17  
18  
19  
20 6 Bureau of International Health Cooperation, National Center for Global Health and Medicine, 1-  
21  
22 7 21-1 Toyama Shinjuku-ku, Tokyo 162-8655, Japan  
23

24  
25 8

26  
27 9

28  
29  
30 10 **\* Corresponding author:**

31  
32 11 Tomoo Ito

33  
34 12 Bureau of International Health Cooperation, National Center for Global Health and Medicine, 1-  
35  
36 13 21-1 Toyama Shinjuku-ku, Tokyo 162-8655, Japan.  
37

38  
39  
40 14 t-itot@it.ncgm.go.jp  
41

42  
43 15

44  
45 16

46  
47 17 **Word count: 4511**

48  
49 18

50  
51  
52 19

1  
2  
3 20 Keywords: COVID-19, infection control, preventive measures, public awareness, Google  
4  
5 21 Trends, global health  
6  
7  
8 22  
9  
10

11 23 **Abstract**  
12  
13

14 24 **Objectives:** The coronavirus disease 2019 (COVID-19) pandemic has influenced people's  
15  
16 25 concerns regarding infectious diseases and their preventive measures. However, the magnitude  
17  
18 26 of the impact and the difference between countries are unclear. This study aimed to assess the  
19  
20 27 magnitude of the impact of COVID-19 on public interest and people's behaviors globally in  
21  
22 28 preventing infectious diseases while comparing international trends and sustainability.  
23  
24

25  
26 29 **Design:** An infodemiology and infoveillance study  
27

28 30 **Setting:** The study employed a web-based data collection to delineate public interest regarding  
29  
30 31 COVID-19 preventive measures using Google Trends.  
31  
32

33 32 **Primary and secondary outcome measures:** A relative search volume was assigned to a  
34  
35 33 keyword, standardizing it from 0 to 100, with 100 representing the highest share of the term  
36  
37 34 searches. The search terms "coronavirus," "wash hand," "social distancing," "hand sanitizer,"  
38  
39 35 and "mask" were investigated across 196 different countries and regions from July 2018 to  
40  
41 36 October 2021 and weekly reports of the relative search volume were obtained. Persistence of  
42  
43 37 interest was assessed by comparing the first 20 weeks with the last 20 weeks of the study period.  
44  
45

46 38 **Results:** Although the relative search volume of "coronavirus" increased and was sustained at a  
47  
48 39 significantly higher level ( $p < 0.05$ ) than before the pandemic declaration, globally, the trends and  
49  
50 40 sustainability of the interest in preventable measures against COVID-19 varied between  
51  
52 41 countries and regions.  
53  
54  
55  
56  
57  
58  
59  
60

1  
2  
3 42 **Conclusions:** Sustained interest in preventive measures differed globally, with regional  
4  
5 43 differences noted among Asia, Europe, Africa, and the Americas. The global differences should  
6  
7 44 be considered for implementing effective interventions against COVID-19. The increased  
8  
9 45 interest in preventive behaviors against COVID-19 may be related to overall infectious disease  
10  
11 46 prevention.  
12  
13  
14  
15 47  
16  
17 48  
18  
19 49  
20  
21  
22 50 **Strengths and limitations of this study**  
23  
24 51

- 26 52 • This study used Google Trends to objectively show the trends in people's interest in  
27  
28 53 COVID-19 and its preventive measures worldwide.  
29  
30  
31 54
- 33 55 • The study monitors people's interest in preventive measures over a long period of time  
34  
35 56 to assess the sustainability of the interest in preventable measures.  
36  
37  
38 57
- 40 58 • The differences in internet availability and the percentage of Google users may have  
41  
42 59 affected the global-level evaluation of public interest using Google Trends.  
43  
44  
45  
46 60  
47  
48  
49 61  
50  
51  
52 62  
53  
54  
55  
56 63

64

65 **INTRODUCTION**

66 The coronavirus disease 2019 (COVID-19) was first reported in Wuhan, China, in November 2019  
67 and was declared a public health emergency of international concern on January 31, 2020. On  
68 March 11, 2020, it was declared a pandemic by the World Health Organization (WHO).[1] As of  
69 December 6, 2021, there have been 265,194,191 confirmed cases of COVID-19, including  
70 5,254,116 deaths.[2] Considering its widespread relevance, the COVID-19 pandemic may impact  
71 people's interest in infectious diseases and their lifestyles.[3] Therefore, the interest in preventive  
72 measures against infectious diseases may be growing worldwide at a whole new level. However,  
73 the magnitude of the impact on people's preventive behavior is difficult to measure objectively,  
74 and the differences in behaviors among countries are unclear. Moreover, with the prolonged  
75 pandemic, it is uncertain whether the growing interest in preventive actions against infectious  
76 diseases can be sustained.

77 When faced with rapidly progressing infectious disease outbreaks, such as COVID-19, the  
78 assessment of population awareness on infection prevention behaviors needs to be accomplished  
79 promptly if the findings are informative in the context of the public health response. However,  
80 such an assessment is not an easy task. For instance, population-representative household surveys  
81 generally require several months of preparation and data collection; therefore, they do not always  
82 provide timely results. Such an effort could be aided using available web search query data, which  
83 provide insight into public interests related to such behaviors.

84 The use of internet search data to draw conclusions on the determinants and delivery of health  
85 information is known as infodemiology.[4, 5] Since the first reported use of search engine data to

1  
2  
3 86 track the 2008 influenza epidemic,[6] several research publications related to behavioral change  
4  
5 87 and public interest in health have utilized the same.[7–11] Google Trends is a web-based tool that  
6  
7 88 analyzes a portion of daily Google searches, generating data on geographical and temporal patterns  
8  
9  
10 89 according to specified keywords. Previous studies have demonstrated accurate prediction and  
11  
12 90 forecasting of current public interests, allowing for analysis in various fields.[12–14]  
13  
14

15  
16 91 Since the Pandemic Declaration by the WHO in 2020, some researchers have investigated the  
17  
18 92 impact of COVID-19 using Google Trends. The very first studies reported that Google Trends  
19  
20 93 could forecast the rise of new cases.[15–17] Since then, studies on various COVID-19 topics have  
21  
22 94 been conducted using Google Trends. Effenberger et al.[18] showed a relationship between the  
23  
24 95 highest interest and the peak of newly confirmed cases. Walker et al.[19] reported a correlation  
25  
26 96 between symptom search terms and confirmed case growth. Further, Sousa-Pinto et al.[20]  
27  
28 97 reported a relationship between media coverage and COVID-19 keywords, whereas Heerfordt and  
29  
30 98 Heerfordt[21] evaluated whether COVID-19 was associated with smoking cessation behaviors.  
31  
32 99 Kutlu[22] reported the trends and impacts of dermatologic diseases on public perceptions during  
33  
34 100 the COVID-19 pandemic, Springer et al.[23] reported the people's interest in the medical  
35  
36 101 therapeutic direction, and Onchonga[24] reported on the use of the interest in self-medication  
37  
38 102 during the COVID-19 pandemic.  
39  
40  
41  
42  
43

44 103 However, the impact of the global COVID-19 pandemic on the long-term interest in preventive  
45  
46 104 measures against infectious diseases has not been studied, and whether such interest can be  
47  
48 105 sustained or is only temporary. Moreover, global differences in public interest regarding COVID-  
49  
50 106 19 and preventive measures have not been objectively monitored.  
51  
52  
53  
54  
55  
56  
57  
58  
59  
60

1  
2  
3 107 This study aimed to assess the magnitude of COVID-19's impact on public interest regarding  
4  
5 108 preventive behaviors by focusing on the pace at which public interest increased due to the COVID-  
6  
7  
8 109 19 pandemic, the suitability of the interest, and types of preventive measures preferred by different  
9  
10 110 countries.

11  
12  
13 111

## 14 15 16 112 **MATERIALS AND METHODS**

17  
18  
19  
20 113 Google Trends was used to quantify and measure changes in internet searches regarding the  
21  
22 114 COVID-19 pandemic worldwide and in each country.

### 23 24 25 115 **Google Trends' function and data collection method**

26  
27  
28  
29 116 Google Trends uses a fraction of searches for a specific term (also known as "keyword" or "search  
30  
31 117 term") and then analyzes the number of Google searches according to a geographical location and  
32  
33 118 defined timeframe. After examining the keyword(s) or topic(s), the region and the period are  
34  
35  
36 119 entered. The region can be a country, a region, or a combined data set of all regions (global). The  
37  
38 120 popularity of a search term in a given week relative to other weeks in the mentioned time period  
39  
40 121 within a geographic region is shown as the relative search volume (RSV). The most popular week  
41  
42 122 has a RSV of 100, while all other weeks are reported relative to the most popular week on a scale  
43  
44 123 from 0 to 99. For example, a RSV of 50 would indicate that the search term was 50% as popular  
45  
46  
47 124 as it was in the most popular week. A score of 0 indicates insufficient searches to show for this  
48  
49  
50 125 term in the week. When a sufficient number of searches cannot be confirmed for a keyword or  
51  
52 126 topic in a specified country, the system display indicates that the data cannot be retrieved.

1  
2  
3 127 For international comparisons among countries using different languages, topic searches are  
4  
5 128 useful. Topics are a group of terms that share the same concept in any language, and they are  
6  
7 129 displayed below search terms. For example, when we searched the topic "London," the search  
8  
9 130 provided results for topics such as the "Capital of the UK" and "Londres"(Spanish), which is  
10  
11 131 "London." This study used topic searches using keywords in 196 countries, and the results of the  
12  
13 132 topic searches are reported as the frequency of searches for all included keywords that refer to the  
14  
15 133 same concept, regardless of the language in the specific countries. This method allowed us to  
16  
17 134 understand the situation on a global level, including in countries where English is not the native  
18  
19 135 language.

20  
21  
22  
23  
24  
25 136 The data are retrieved directly from the Google Trends Explore page in .csv format. If the survey  
26  
27 137 period is long, the values are displayed as weekly values.

28  
29  
30 138 In this study, first, the RSV of one topic in one country was obtained for a defined period on a  
31  
32 139 weekly basis. This work was repeated for all the topics. Second, the same process was repeated  
33  
34 140 for the 196 countries and regions. Finally, differences between countries and regions in the  
35  
36 141 trends and sustainability of the topics were examined. Data for global trends (combined data set  
37  
38 142 of all regions) were obtained by changing the location setting on Google Trends to "Worldwide"  
39  
40 143 for a defined period for each topic.

#### 41 42 43 44 45 144 **Target country, search term selection, and study term**

46  
47  
48 145 For the 196 countries and regions around the world, Google Trend's "Topics" was used to show  
49  
50 146 the RSVs of "coronavirus" and typical preventive behaviors, including "wash hand" and "social  
51  
52 147 distancing," and the supplies needed for prevention, such as "hand sanitizer" and "mask." These

1  
2  
3 148 topic terms were mentioned on the Centers for Disease Control and Prevention (CDC) site [25] as  
4  
5 149 recommendations for prevention and were listed as related topics in Google Trend's coronavirus.  
6  
7

8  
9 150 The specified survey period was set using the following procedures: First, the end of October 2021  
10  
11 151 was set as the study's end period, and the most recent RSV was obtained on November 1, 2021.  
12  
13 152 Second, the study's starting point was set from the same interval period between the WHO  
14  
15 153 pandemic declaration and the study's end period. It was 85 weeks before and 85 weeks after the  
16  
17 154 week of March 11, 2020. [1] Therefore, the date range was from the week of July 22, 2018, to that  
18  
19 155 of October 24, 2021. Assessing the timing of raising the interest in each topic term  
20  
21  
22

23 156 For each country's topic term, the week in which RSV exceeded 50 (RSV50) after the beginning  
24  
25 157 of 2020 was defined as the timing of the rise in RSV in each country. In Google Trends, RSV50  
26  
27 158 means 50% of the search activity of the peak (RSV100) was performed in particular countries and  
28  
29 159 regions using the defined term.  
30  
31  
32

### 33 160 **Assessing the sustainability of people's interest**

34  
35  
36  
37 161 In this study, the sustainability of interest was assessed by comparing the last 20 weeks (from the  
38  
39 162 week of June 13, 2021, to that of October 24, 2021) of the survey period with the first 20 weeks  
40  
41 163 (from the week of July 22, 2018, to that of December 2, 2018) for each topic term. This was  
42  
43 164 because all topics used in this study are terms that had been used before the COVID-19 pandemic;  
44  
45 165 thus, if the RSV in the latter period, which was more than 1 year after the WHO pandemic  
46  
47 166 declaration, was higher than the RSV in the period before the outbreak, the sustainability on public  
48  
49 167 interest was presented regardless of its magnitude.  
50  
51  
52

### 53 168 **Statistical analysis**

54  
55  
56  
57  
58  
59  
60



1  
2  
3 169 The Mann–Whitney U test was used to compare the RSV during the first 20 weeks at the beginning  
4  
5 170 of the study (from the week of July 22, 2018, to that of December 2, 2018) with the RSV during  
6  
7 171 the last 20 weeks at the end of the study (from the week of June 13, 2021, to that of October 24,  
8  
9 172 2021) for each topic term. All statistical analyses were performed using IBM SPSS Statistics for  
10  
11 173 Windows, version 25 (IBM Corp., Armonk, NY, USA).  $P < 0.05$  was considered statistically  
12  
13 174 significant.  
14  
15  
16  
17

### 18 175 **Ethical considerations**

19  
20  
21 176 The study did not require ethics approval because the RSVs obtained from Google Trends were  
22  
23 177 publicly available, fully anonymized, and aggregated data.  
24  
25  
26

### 27 178 **Patient and public involvement**

28  
29  
30 179 No patients and/or general public were involved in setting the research question or the outcome  
31  
32 180 measures, nor were they involved in developing plans for the study design or implementation.  
33  
34 181 They were not asked to advise on the interpretation or writing of results. There are no plans to  
35  
36 182 disseminate the research results to study participants or the relevant patient community.  
37  
38  
39  
40  
41  
42

43  
44 183

## 45 184 **RESULTS**

### 46 185 **Global trends (combined data set of all regions)**

47  
48  
49  
50 186 The search terms “coronavirus,” “wash hand,” “social distancing,” “hand sanitizer,” and “mask”  
51  
52 187 reached RSV 50 by the week of the WHO pandemic declaration (March 11, 2020) in global trends  
53  
54 188 (combined data set of all regions). Subsequently, “coronavirus,” “wash hand,” and “hand sanitizer”  
55  
56  
57  
58  
59  
60

1  
2  
3 189 RSVs peaked (RSV100) in the week of the WHO pandemic declaration. This was followed by the  
4  
5 190 RSV of “social distancing” a week later (the week of March 15, 2020) and that of “mask” 3 weeks  
6  
7  
8 191 later (the week of April 5, 2020) (Figure 1). In Global Trends, the RSVs of “coronavirus,” “wash  
9  
10 192 hand,” “social distancing,” “hand sanitizer,” and “mask” were significantly higher ( $p < 0.05$ ) in the  
11  
12 193 last 20 weeks of the study period (from the week of June 13, 2021, to the week of October 24,  
13  
14 194 2021) than in the first 20 weeks before the pandemic declaration (from the week of July 22, 2018,  
15  
16  
17 195 to that of December 2, 2018).

### 196 **Search word “coronavirus” trend**

197 “coronavirus” RSVs were obtained in 196 countries and territories. All of the target countries and  
198 regions had enough searches to show RSVs. In late January 2020, only eight countries (4.1%) in  
199 and mainly around China reached RSV50 (Bhutan, China, Laos, Macao, Mongolia, Philippines,  
200 Thailand, and Vietnam). However, in the week of the pandemic declaration (the week of March 8,  
201 2020), the number of countries that reached RSV50 rose sharply, especially in the Americas and  
202 Europe, and by late March, 96.4% of all the countries and regions, including African countries,  
203 reached RSV50. Japan, which was the only G7 country that did not initially have a  $RSV \geq 50$ , had  
204 a  $RSV \geq 50$  at this time. In early April, the RSV reached 50 in all targeted regions (Table 1, Figure  
205 2).

206

### 207 **Table 1. Number of countries with a $RSV \geq 50$**

|                                                           | Week of<br>January<br>26, 2020 | Week of<br>February<br>23, 2020 | Week of<br>March 8,<br>2020 | Week of<br>March<br>22, 2020 | Week of<br>April 5,<br>2020 |
|-----------------------------------------------------------|--------------------------------|---------------------------------|-----------------------------|------------------------------|-----------------------------|
| RSV “coronavirus”                                         |                                |                                 |                             |                              |                             |
| Number of<br>countries<br>with RSV<br>> 50, N<br>(%)      | 8 (4.1%)                       | 18 (9.2%)                       | 118<br>(60.2%)              | 189<br>(96.4%)               | 196<br>(100%)               |
| Number of<br>countries<br>without<br>valid data,<br>N (%) | 0 (0%)                         | 0 (0%)                          | 0 (0%)                      | 0 (0%)                       | 0 (0%)                      |
| RSV“wash hand”                                            |                                |                                 |                             |                              |                             |
| Number<br>of<br>countries<br>with                         | 10<br>(5.1%)                   | 37<br>(18.9%)                   | 107<br>(54.6%)              | 160<br>(81.6%)               | 171<br>(87.2%)              |

|                                               |            |            |            |             |             |
|-----------------------------------------------|------------|------------|------------|-------------|-------------|
| RSV $\geq$ 50, N (%)                          |            |            |            |             |             |
| Number of countries without valid data, N (%) | 4 (2.0%)   | 4 (2.0%)   | 4 (2.0%)   | 4 (2.0%)    | 4 (2.0%)    |
| RSV“social distancing”                        |            |            |            |             |             |
| Number of countries with RSV $\geq$ 50, N (%) | 0 (0.0%)   | 0 (0.0%)   | 18 (9.2%)  | 102 (52.0%) | 125 (63.8%) |
| Number of                                     | 22 (11.2%) | 22 (11.2%) | 22 (11.2%) | 22 (11.2%)  | 22 (11.2%)  |

|                                                                 |             |               |                |                |                |
|-----------------------------------------------------------------|-------------|---------------|----------------|----------------|----------------|
| countries<br>without<br>valid<br>data, N<br>(%)                 |             |               |                |                |                |
| RSV “hand sanitizer”                                            |             |               |                |                |                |
| Number<br>of<br>countries<br>with<br>RSV $\geq$<br>50, N<br>(%) | 8<br>(4.1%) | 24<br>(12.2%) | 121<br>(61.7%) | 186<br>(94.9%) | 187<br>(95.4%) |
| Number<br>of<br>countries<br>without<br>valid<br>data, N<br>(%) | 3<br>(1.5%) | 3<br>(1.5%)   | 3<br>(1.5%)    | 3<br>(1.5%)    | 3<br>(1.5%)    |

| RSV “mask”                                    |               |               |               |                |                |
|-----------------------------------------------|---------------|---------------|---------------|----------------|----------------|
| Number of countries with RSV $\geq$ 50, N (%) | 27<br>(13.8%) | 65<br>(33.2%) | 77<br>(39.3%) | 130<br>(66.3%) | 154<br>(78.6%) |
| Number of countries without valid data, N (%) | 1<br>(0.5%)   | 1<br>(0.5%)   | 1<br>(0.5%)   | 1<br>(0.5%)    | 1<br>(0.5%)    |

208

### 209 Search word “wash hand” trend

210 In total, 192 countries and territories had “wash hand” RSVs, and four countries (Central Africa,  
 211 Commonwealth of Dominica, Eritrea, and Turks and Caicos Islands) did not have enough searches  
 212 to show RSVs. Six countries (3.1%) reached RSV50 in late January 2020 and included mostly

1  
2  
3 213 Asian countries around China: Brunei, Cambodia, Singapore, South Korea, Taiwan, and Vietnam.  
4  
5 214 Moreover, Antigua and Barbuda, Bhutan, Cyprus, and Syria were also above RSV50, but this was  
6  
7  
8 215 a temporary increase as it dropped to zero in the following week of late January 2020.  
9

10  
11 216 In the week after the pandemic was declared (the week of March 8, 2020), 107 countries (54.6%),  
12  
13 217 mainly in North America, Europe, and Asia, had RSVs  $\geq 50$ , and by late March, 160 countries  
14  
15 218 (81.6%), including most countries in South America, had RSVs  $\geq 50$ . Japan, which was the only  
16  
17 219 G7 country that did not have a RSV  $\geq 50$  in the week of March 8, 2020, had a RSV  $\geq 50$  at this  
18  
19 220 time. Conversely, even in early April, the RSV did not exceed 50 in 21 countries (10.7%),  
20  
21 221 including nine countries on the African continent (Algeria, Botswana, Burundi, Cameroon,  
22  
23 222 Mozambique, Republic of Congo, Seychelles, Sudan, and Vanuatu) and countries in other areas  
24  
25 223 (Table 1, Figure 2).  
26  
27  
28  
29

### 30 224 **Search word “social distancing” trend**

31  
32  
33  
34 225 “social distancing” RSVs were obtained in 174 countries and territories. There were 22 regions  
35  
36 226 and countries that did not have enough searches to show RSVs.  
37

38  
39 227 Only 18 countries (9.2%) had a RSV  $\geq 50$ , even when the pandemic was declared (the week of  
40  
41 228 March 8, 2020). In late March, 102 countries (52.0%), mainly in the Americas, Europe, and Asia,  
42  
43 229 had a RSV  $\geq 50$ . In early April, 125 countries (63.8%) had a RSV  $\geq 50$ , but 49 countries (25.0%)  
44  
45 230 in various regions, including two G7 countries (France, Italy) in Europe (n=7), Asia and Oceania  
46  
47 231 (n=10), America (n=16), and Africa (n=16) did not have a RSV  $\geq 50$  (Table 1, Figure 2). The  
48  
49 232 highest number of countries did not reach a RSV  $\geq 50$  with respect to the search term “social  
50  
51 233 distancing” (n=49) by early April compared with that noted for other study terms, such as  
52  
53 234 “coronavirus” (n=0), “wash hand” (n=21), “hand sanitizer” (n=7), and “mask.” n=41).  
54  
55  
56  
57  
58  
59  
60

### 235 **Search word “hand Sanitizer” trend**

236 In 193 countries and territories, “hand sanitizer” RSVs were available, and in the three countries  
237 (Central Africa, Eritrea, and Liechtenstein), there were not enough searches to show RSVs.

238 In late January 2020, eight countries (4.1%), mainly those around China (Cambodia, China,  
239 Macao, Maldives, Singapore, South Korea, Taiwan, and Vietnam), had RSVs  $\geq 50$ , and in the week  
240 of the pandemic declaration, the number of countries with a RSV  $\geq 50$  increased to 121 (61.7%).  
241 Subsequently, the number of countries with a RSV  $\geq 50$  gradually increased to 187 (95.4%) in  
242 early April (Table 1, Figure 2). The countries with RSVs  $< 50$  by early April (Burundi,  
243 Commonwealth of Dominica, Liberia, New Caledonia, Suriname, Tajikistan, Turkmenistan) had  
244 reached a RSV of 50 at various later times.

### 245 **Search word “mask” trend**

246 Valid “mask” RSVs were obtained for 195 countries and regions, and only one country (Eritrea)  
247 did not have enough searches to display a RSV. In late January 2020, 27 countries (13.8%) had a  
248 RSV  $\geq 50$ . They consisted mainly of countries around China (Cambodia, China, Japan, Lao PDR,  
249 Macao, Malaysia, Mongolia, Myanmar, Philippines, Singapore, South Korea, Taiwan, Thailand,  
250 and Vietnam) and some countries in other areas. In late March, there were 130 countries with a  
251 RSV  $\geq 50$ ; in contrast, the United States and some European countries still did not have a RSV  
252  $\geq 50$ . Then, in early April, 154 countries (78.6%) had a RSV  $\geq 50$ . Forty-one countries, including  
253 many major European countries (Belgium, Finland, France, Germany, Ireland, Switzerland, and  
254 the United Kingdom), African countries, countries on the South American continent, Australia,  
255 and New Zealand had not reached RSV  $\geq 50$  by early April but had reached RSV of 50 at various  
256 later times (Table 1, Figure 2).



1  
2  
3 257 **Comparison of RSV  $\geq 65$  weeks after the declaration of the pandemic and before the**  
4  
5 258 **COVID-19 pandemic**  
6  
7

8  
9 259 In 191 countries, the RSV of “coronavirus” was significantly higher ( $p < 0.05$ ) in the last 20 weeks  
10  
11 260 of this study term than in its first 20 weeks before the pandemic declaration. There were five  
12  
13 261 countries (Central Africa, Djibouti, Eritrea, Liberia, and Samoa) with no significant difference.  
14  
15

16  
17 262 In 24 countries (12.2%), the RSV of “wash hand” was significantly higher ( $p < 0.05$ ) in the last 20  
18  
19 263 weeks of this study term than in its first 20 weeks before the pandemic declaration. The majority  
20  
21 264 of these countries were from Asia and Oceania (Australia, Bangladesh, India, Indonesia, Japan,  
22  
23 265 Malaysia, Philippines, Singapore, South Korea, Taiwan, Thailand, and Vietnam); followed by  
24  
25 266 those of the Americas (Brazil, Chile, Colombia, Ecuador, Nicaragua, USA, and Venezuela);  
26  
27 267 Europe (the Netherlands and the United Kingdom); and Africa (Kenya and South Africa).  
28  
29  
30

31 268 The RSV for “social distancing” was significantly higher ( $p < 0.05$ ) in 41 countries (20.9%) in the  
32  
33 269 last 20 weeks than in the first 20 weeks of this study before the pandemic declaration. It was  
34  
35 270 widely distributed among 14 Asian and Oceania countries (Australia, Bangladesh, Fiji, India,  
36  
37 271 Indonesia, Japan, Malaysia, New Zealand, Philippines, Singapore, South Korea, Taiwan,  
38  
39 272 Thailand, and Vietnam); three Middle Eastern countries (Pakistan, Saudi Arabia, and the UAE);  
40  
41 273 seven European countries (France, Germany, Ireland, Italy, Spain, Turkey, and the United  
42  
43 274 Kingdom); 14 American countries (Argentina, Bolivia, Brazil, Canada, Chile, Colombia,  
44  
45 275 Dominican Republic, Ecuador, Mexico, Panama, Paraguay, Peru, USA, and Venezuela); and  
46  
47 276 three African countries (South Africa, South Sudan, and Zimbabwe).  
48  
49  
50  
51  
52

53 277 In 74 countries (37.8%), “hand sanitizer” had a significantly higher RSV ( $p < 0.05$ ) in the last 20  
54  
55 278 weeks of this study term than in the first 20 weeks before the pandemic declaration. The countries  
56  
57  
58  
59  
60

1  
2  
3 279 with statistical significance were widely distributed among 20 Asian and Oceania countries  
4  
5 280 (Australia, Bangladesh, Brunei, Cambodia, China, India, Indonesia, Japan, Kazakhstan, Malaysia,  
6  
7 281 Myanmar, Nepal, New Zealand, Philippines, Singapore, South Korea, Sri Lanka, Taiwan,  
8  
9 282 Thailand, and Vietnam); eight Middle Eastern countries (Iran, Kuwait, Lebanon, Oman, Pakistan,  
10  
11 283 Qatar, Saudi Arabia, and the UAE); 17 European countries (Belgium, Denmark, Finland, France,  
12  
13 284 Georgia, Germany, Ireland, Italy, Netherlands, Norway, Poland, Portugal, Russia, Spain, Turkey,  
14  
15 285 Ukraine, and the United Kingdom); 17 American countries (Argentina, Brazil, Canada, Chile,  
16  
17 286 Colombia, Costa Rica, Dominican Republic, Ecuador, El Salvador, Mexico, Paraguay, Peru,  
18  
19 287 Puerto Rico, Trinidad and Tobago, USA, Uruguay, and Venezuela); and 12 African countries  
20  
21 288 (Algeria, Botswana, Ethiopia, Kenya, Libya, Mauritius, Morocco, Nigeria, South Africa, Tunisia,  
22  
23 289 Uganda, and Zimbabwe).

24  
25  
26  
27  
28  
29 290 In 98 countries (50.0%), the RSV of “mask” was significantly higher ( $p < 0.05$ ) in the last 20 weeks  
30  
31 291 of this study term than in its first 20 weeks before the pandemic declaration. This was a higher  
32  
33 292 percentage than for any other prevention-related word. Those with significant differences in RSV  
34  
35 293 included 34 European (Albania, Austria, Belarus, Belgium, Bulgaria, Croatia, Denmark, Estonia,  
36  
37 294 Finland, France, Germany, Greece, Hungary, Iceland, Isle of Man, Ireland, Jersey, Kosovo, Latvia,  
38  
39 295 Lithuania, Luxembourg, Malta, Moldova, Netherlands, Poland, Portugal, Romania, Russia,  
40  
41 296 Slovenia, Spain, Switzerland, Turkey, Ukraine, and the United Kingdom); 16 American  
42  
43 297 (Argentina, Bahamas, Barbados, Brazil, Canada, Cuba, Dominican Republic, Guam, Jamaica,  
44  
45 298 Mexico, Panama, Sint Maarten, Saint Helena, Trinidad and Tobago, USA, and Venezuela); 19  
46  
47 299 Asian and Oceania (Australia, Bangladesh, Bhutan, Brunei, Cambodia, Fiji, India, Indonesia,  
48  
49 300 Japan, Kazakhstan, Macao, Malaysia, Nepal, New Zealand, Philippines, Singapore, Sri Lanka,  
50  
51 301 Taiwan, and Uzbekistan); 12 Middle Eastern (Afghanistan, Bahrain, Iran, Iraq, Israel, Kuwait,  
52  
53  
54  
55  
56  
57  
58  
59  
60

1  
2  
3 302 Oman, Pakistan, Qatar, Saudi Arabia, the UAE, and Yemen); and 17 African countries  
4  
5 303 (Democratic Republic of the Congo, Egypt, Ethiopia, Ghana, Kenya, Mauritius, Morocco, Nigeria,  
6  
7 304 Reunion, Rwanda, Senegal, Somalia, South Africa, Sudan, Uganda, Zambia, and Zimbabwe)  
8  
9  
10 305 (Figure 3).  
11  
12

13 306  
14  
15

## 16 307 **DISCUSSION**

17  
18  
19  
20 308 The COVID-19 pandemic has had a significant impact on global public awareness and behavior,  
21  
22 309 including an increased interest in the prevention of infectious diseases. However, the magnitude  
23  
24 310 of the impact and the differences among countries are unclear. To our knowledge, this is the first  
25  
26 311 study to use Google Trends to objectively show the trends in people's interest in COVID-19 and  
27  
28 312 its preventive measures in countries and regions worldwide. As globalization progresses, it is  
29  
30 313 necessary to consider countermeasures against globally transmitted infectious diseases, such as  
31  
32 314 COVID-19, from a global perspective. Therefore, understanding the trends in people's interest in  
33  
34 315 preventive measures is important to consider global countermeasures. We noted some interesting  
35  
36 316 observations in the present situation of the global interest in COVID-19 and preventable measures.  
37  
38  
39  
40  
41 317 First, the global interest in coronaviruses among people with COVID-19 has increased to an  
42  
43 318 unprecedented level after the WHO declared a pandemic in March 2020;<sup>[1]</sup> interest in  
44  
45 319 "coronavirus" has been maintained to a certain extent even now, more than a year and a half after  
46  
47 320 the outbreak. We also noted an increase in interest in preventable measures globally. However, the  
48  
49 321 timings of the increase differed by country and region. Even though most countries also "reacted"  
50  
51 322 to prevention measures at the time of the WHO pandemic declaration, some countries increased  
52  
53 323 interest in preventable measures much earlier than others. Geographical and political factors may  
54  
55  
56  
57  
58  
59  
60

1  
2  
3 324 have influenced the timing of the increase. For example, the countries around China, such as (e.g.  
4  
5 325 Vietnam), increased their public interest much before the WHO's pandemic declaration, when  
6  
7 326 Chinese travellers were banned from the country at a very early phase. [26] Contrastingly, in Japan,  
8  
9  
10 327 the interest in "coronavirus" and preventable measures peaked much later than in other high-  
11  
12 328 income countries after the WHO pandemic declaration. This occurred when the Japanese  
13  
14 329 government first declared a state of emergency on April 7, 2020.

15  
16  
17  
18 330 The "increase" in awareness and how to sustain the interest in measures for preventing infectious  
19  
20 331 diseases were focused on. In most countries and regions, I found that people's interest in COVID-  
21  
22 332 19 and preventive measures increased, but the persistence of interest in these preventable measures  
23  
24 333 was not necessarily maintained; there was also a difference in the sustainability level of interest  
25  
26 334 by country and region. Furthermore, with these differences in each country's characteristics, there  
27  
28 335 are also differences in sustainability between the search words "wash hand," "social distancing,"  
29  
30 336 "hand sanitizer," and "mask."

31  
32  
33  
34  
35 337 The sustainability of people's interest in masks was confirmed in a wide range of countries and  
36  
37 338 regions than other search terms. At the beginning of the outbreak, interest in masks spread mainly  
38  
39 339 in Asian countries relatively quickly, where a mask culture was already present. A report showed  
40  
41 340 the regional difference in wearing masks by region at an early stage of the COVID-19 pandemic.  
42  
43 341 [27] This might be attributed to geographic and cultural differences that could have enhanced self-  
44  
45 342 protecting habits. [28] However, notably, the sustainability of the other word "impact" of "mask"  
46  
47 343 was confirmed in many countries that are not necessarily familiar with the practice of wearing  
48  
49 344 masks during winter, such as many Western countries. [29] This implies that familiarity with  
50  
51 345 masks may spread in countries without a mask-wearing culture. Although the effectiveness of  
52  
53  
54  
55  
56  
57  
58  
59  
60

1  
2  
3 346 facemask use in community settings for COVID-19 prevention has been controversial, [30–32] the  
4  
5 347 COVID-19 pandemic introduced a “new culture” to these countries and regions.  
6  
7

8  
9 348 Contrastingly, countries that could sustain interest in the search term “wash hand” were relatively  
10  
11 349 limited. Notably, the impact of COVID-19 was confirmed in relatively few European countries  
12  
13 350 with low sustainable interest for the term “wash hand,” where the cumulative number of confirmed  
14  
15 351 cases was high. [2] The impact was concentrated in Southeast and East Asian countries, where the  
16  
17 352 number of confirmed cases and death rates were relatively low. [2] This suggests that for the  
18  
19 353 countries that did not sustain the interest of “wash hand,” including many European countries,  
20  
21 354 interventions to maintain public interest may be necessary in cases of repeated outbreaks. As  
22  
23 355 governments consider effective ways to control infections, they need to consider that they may not  
24  
25 356 be able to sustain the population’s interest in preventive actions against infection.  
26  
27  
28  
29

30  
31 357 Countries in East and Southeast Asia maintained an interest in “wash hand” and in other preventive  
32  
33 358 measures such as “social distancing” and “hand sanitizer.” Thus, in these regions, the COVID-19  
34  
35 359 pandemic greatly impacted the public mind’s interest and awareness of prevention measures  
36  
37 360 against infectious diseases. Since prevention methods are common to many infectious diseases,  
38  
39 361 the increased awareness of people regarding the prevention measures due to the COVID-19  
40  
41 362 pandemic can be expected to be reflected in future COVID-19 trends and in the decrease in other  
42  
43 363 infectious diseases. Some previous studies in East Asia reported that the number of seasonal  
44  
45 364 influenza cases in the 2019–2020 season was lower after COVID-19 transmission than in previous  
46  
47 365 years and suggested the positive effects of prevention measures against COVID-19 on seasonal  
48  
49 366 influenza. [33–35] The National Institute of Infectious Diseases in Japan also reported that in 2020  
50  
51 367 and 2021, mycoplasma pneumonia, respiratory syncytial virus infection, and Group A  
52  
53 368 streptococcal pharyngitis decreased, whereas infectious gastroenteritis significantly decreased and  
54  
55  
56  
57  
58  
59  
60

1  
2  
3 369 reached its lowest level in a decade. [36] These infections can be effectively prevented by washing  
4  
5 370 hands, social distancing, using hand sanitizers, and wearing masks, as discussed in this study. In  
6  
7  
8 371 combination with these trends and the results from this study, it is suggested that the increasing  
9  
10 372 interest in preventive actions in East Asian countries may be associated with the decrease in other  
11  
12 373 infectious diseases.

14  
15  
16 374 The other main finding of the difference between the regions is the slower pace of development of  
17  
18 375 interest in countries on the African continent as well as the limited areas where the persistence of  
19  
20 376 interest had been observed, especially in terms that were related to behavior change, such as “wash  
21  
22 377 hand” and “social distancing.” When interpreting data about African countries, it is necessary to  
23  
24  
25 378 consider their relatively low level of internet availability. [37] However, considering that the trend  
26  
27 379 of increased and sustained interest in “coronavirus” was confirmed even in African countries at  
28  
29 380 the same level as other regions, the general interest in preventive measures in the African continent  
30  
31  
32 381 can be considered relatively lower. Thus, the data can be used as a reference for understanding the  
33  
34 382 present situation in Africa. Some studies also mentioned the issues of attitude toward knowledge  
35  
36 383 and healthy practices, including COVID-19 preventive practices in African countries. [38–40] The  
37  
38  
39 384 low-level interest in preventive measures in African countries needs to be considered in future  
40  
41 385 strategies for expanding preventive measures against infectious diseases at the global level. As the  
42  
43 386 pandemic is still unfolding, there is a strong need to continually implement health promotion  
44  
45 387 measures to better prevent the pandemic and improve related-health behaviors in African  
46  
47  
48 388 populations and countries with low impact of public interest on preventable measures.

49  
50  
51 389 The COVID-19 pandemic caused damage and impacted people’s lives worldwide. The study  
52  
53 390 results showed that people's interest in preventable measures against infectious diseases  
54  
55  
56 391 increased in most countries. This unprecedented opportunity should be maximized by  
57

1  
2  
3 392 policymakers, and appropriate policies should be implemented to maintain the increased interest  
4  
5 393 in preventable measures, which will lead to future infectious disease control.  
6  
7

8  
9 394 This study had some limitations. First, differences in the levels of internet availability may have  
10  
11 395 affected the results. Second, the percentage of Google users may have affected the global-level  
12  
13 396 evaluation of public interest using Google Trends. A typical example is the extreme low share of  
14  
15 397 Google as a web search engine in China, given that they may have used other search engines and  
16  
17 398 hence did not use Google.[41] Therefore, Google Trends is not a suitable tool for understanding  
18  
19 399 trends in countries such as China; the results of these countries should be interpreted based on  
20  
21 400 this prior knowledge. Although it is necessary to consider these differences to interpret the  
22  
23 401 results globally, the sustainability of the search term “coronavirus” was uniform in almost all  
24  
25 402 countries because of the consistent volume of internet searches from almost all countries and  
26  
27 403 regions throughout the study period. This suggests that the global spread of the tools used in this  
28  
29 404 study was sufficient to grasp global trends.  
30  
31  
32  
33  
34

35 405

## 38 406 **CONCLUSION**

39  
40  
41 407 The COVID-19 pandemic may have impacted the global public interest in prevention measures  
42  
43 408 against infectious diseases. However, there are differences in interest related to preventable  
44  
45 409 measures and sustainability of that interest between countries and regions. The increased interest  
46  
47 410 in preventive behaviors against COVID-19 may be related to overall infectious disease prevention.  
48  
49 411 These global differences should be considered when implementing effective interventions against  
50  
51 412 infectious diseases at the global level.  
52  
53  
54  
55  
56  
57  
58  
59  
60

1  
2  
3 413  
4  
56 414 **Competing Interests**7  
8  
9  
10 415 The author declares that the research was conducted in the absence of any commercial or financial  
11  
12 416 relationships that could be construed as a potential conflict of interest.  
13  
1415 417 **Author Contributions**16  
17  
18 418 Tomoo Ito was involved in the study design, data analysis, interpretation, and creation of  
19  
20 419 tables and figures and wrote the final report.  
21  
2223 420 **Funding**24  
25 421 This research did not receive any specific grant from funding agencies in the public, commercial,  
26  
27 422 or not-for-profit sectors.  
28  
2930  
31 423 **Ethical Approval**32  
33  
34 424 The study did not require ethics approval because the RSVs obtained from Google Trends were  
35  
36 425 publicly available, fully anonymized, and aggregated data.  
37  
38  
3940 426 **Acknowledgments**41  
42  
43 427 All work on this paper was done by Tomoo Ito alone, and there were no other collaborators on this  
44  
45 428 paper.  
46  
47  
4849 429 **Data Availability Statement**50  
51  
52 430 The data that support the findings of this study are available from the author upon reasonable  
53  
54 431 request.  
55  
56  
57  
58  
59  
60



432 **References**

- 433 1 World Health Organization WHO, director. *General's opening remarks at the media*  
434 *briefing on COVID-19*. [http://www.who.int/dg/speeches/detail/who-director-general-s-](http://www.who.int/dg/speeches/detail/who-director-general-s-opening-remarks-at-the-media-briefing-on-covid-19---11-march-2020)  
435 [opening-remarks-at-the-media-briefing-on-covid-19---11-march-2020](http://www.who.int/dg/speeches/detail/who-director-general-s-opening-remarks-at-the-media-briefing-on-covid-19---11-march-2020) (Accessed Nov 1,  
436 2021).
- 437 2 World Health Organization. WHO coronavirus disease (COVID-19) Dashboard [Internet].  
438 <https://covid19.who.int> (Accessed Nov 1, 2021).
- 439 3 Xiang M, Zhang Z, Kuwahara K. Impact of COVID-19 pandemic on children and  
440 adolescents' lifestyle behavior larger than expected. *Prog Cardiovasc Dis* 2020;63:531–2.  
441 DOI: 10.1016/j.pcad.2020.04.013.
- 442 4 Eysenbach G. Infodemiology and infoveillance: Framework for an emerging set of public  
443 health informatics methods to analyze search, communication and publication behavior on the  
444 Internet. *J Med Internet Res* 2009;11:e11. DOI: 10.2196/jmir.1157, PMID:19329408.
- 445 5 Eysenbach G. Infodemiology and infoveillance tracking online health information and  
446 cyber behavior for public health. *Am J Prev Med* 2011;40(5);Supplement 2:S154–8. DOI:  
447 10.1016/j.amepre.2011.02.006.
- 448 6 Pervaiz F, Pervaiz M, Abdur Rehman N et al. FluBreaks: Early epidemic detection from  
449 Google flu trends. *J Med Internet Res* 2012;14:e125. DOI: 10.2196/jmir.2102.

- 1  
2  
3 450 7 Mavragani A, Ochoa G, Tsagarakis KP. Assessing the methods, tools, and statistical  
4  
5 451 approaches in Google Trends research: Systematic review. *J Med Internet Res* 2018;20:e270.  
6  
7 452 DOI: 10.2196/jmir.9366.  
8  
9  
10  
11 453 8 Nuti SV, Wayda B, Ranasinghe I et al. The use of Google Trends in health care research:  
12  
13 454 A systematic review. *PLOS ONE* 2014;9:e109583. DOI: 10.1371/journal.pone.0109583.  
14  
15  
16  
17 455 9 Alicino C, Bragazzi NL, Faccio V et al. Assessing Ebola-related web search behaviour:  
18  
19 456 Insights and implications from an analytical study of Google Trends-based query volumes.  
20  
21 457 *Infect Dis Pover* 2015;4:54. DOI: 10.1186/s40249-015-0090-9.  
22  
23  
24  
25 458 10 Lin YH, Liu CH, Chiu YC. Google searches for the keywords of “wash hands” predict the  
26  
27 459 speed of national spread of COVID-19 outbreak among 21 countries. *Brain Behav Immun*  
28  
29 460 2020;87:30–2. DOI: 10.1016/j.bbi.2020.04.020.  
30  
31  
32  
33 461 11 Cervellin G, Comelli I, Lippi G. Is Google Trends a reliable tool for digital epidemiology?  
34  
35 462 Insights from different clinical settings. *J Epidemiol Glob Health* 2017;7:185–9. DOI:  
36  
37 463 10.1016/j.jegh.2017.06.001.  
38  
39  
40  
41 464 12 Scharkow M, Vogelgesang J. Measuring the public agenda using search engine queries. *Int*  
42  
43 465 *J Public Opin Res* 2011;23:104–13. DOI:10.1093/ijpor/edq048.  
44  
45  
46  
47 466 13 Choi H, Varian H. Predicting the present with Google Trends. *Econ Rec* 2012;88:2–9. DOI:  
48  
49 467 10.1111/j.1475-4932.2012.00809.x.  
50  
51  
52  
53  
54  
55  
56  
57  
58  
59  
60

- 1  
2  
3 468 14 Stein JD, Childers DM, Nan B et al. Gauging interest of the general public in laser-assisted  
4  
5 469 in situ keratomileusis eye surgery. *Cornea* 2013;32:1015–8. DOI:  
6  
7 470 10.1097/ICO.0b013e318283c85a.  
8  
9  
10  
11 471 15 Strzelecki A. The second worldwide wave of interest in coronavirus since the COVID-19  
12  
13 472 outbreaks in South Korea, Italy and Iran: A Google Trends study. *Brain Behav Immun*  
14  
15 473 2020;88:950–1. DOI: 10.1016/j.bbi.2020.04.042.  
16  
17  
18  
19 474 16 Ayyoubzadeh SM, Ayyoubzadeh SM, Zahedi H et al. Predicting COVID-19 incidence  
20  
21 475 through analysis of Google Trends data in Iran: Data mining and deep learning pilot study. *J*  
22  
23 476 *Med Internet Res Public Health Surveill* 2020;14;6:e18828. DOI: 10.2196/18828.  
24  
25  
26  
27 477 17 Ortiz-Martínez Y, Garcia-Robledo JE, Vásquez-Castañeda D et al. Can Google® trends  
28  
29 478 predict COVID-19 incidence and help preparedness? The situation in Colombia. *Travel Med*  
30  
31 479 *Infect Dis* 2020;37:101703. DOI:10.1016/j.tmaid.2020.101703  
32  
33  
34  
35 480 18 Effenberger M, Kronbichler A, Shin JI et al. Association of the COVID-19 pandemic with  
36  
37 481 internet search volumes: A Google Trends™ analysis. *Int J Infect Dis* 2020;95:192–7.  
38  
39 482 DOI:10.1016/j.ijid.2020.04.033.  
40  
41  
42  
43 483 19 Walker A, Hopkins C, Surda P. Use of Google Trends to investigate loss-of-smell-related  
44  
45 484 searches during the COVID-19 outbreak. *Int Forum Allergy Rhinol* 2020;10:839–47. DOI:  
46  
47 485 10.1002/alr.22580.  
48  
49  
50  
51 486 20 Sousa-Pinto B, Anto A, Czarlewski W et al. Assessment of the impact of media coverage  
52  
53 487 on COVID-19-related Google Trends data: Infodemiology study. *J Med Internet Res*  
54  
55 488 2020;22:e19611. DOI: 10.2196/19611.  
56  
57  
58  
59  
60

- 1  
2  
3 489 21 Heerfordt C, Heerfordt IM. Has there been an increased interest in smoking cessation  
4  
5 490 during the first months of the COVID-19 pandemic? A Google Trends study. *Public Health*  
6  
7 491 2020;183:6–7. DOI: 10.1016/j.puhe.2020.04.012.  
8  
9  
10  
11 492 22 Kutlu Ö. Analysis of dermatologic conditions in Turkey and Italy by using Google Trends  
12  
13 493 analysis in the era of the COVID-19 pandemic. *Dermatol Ther* 2020;33:e13949.  
14  
15 494 DOI:10.1111/dth.13949.  
16  
17  
18  
19 495 23 Springer S, Menzel LM, Zieger M. Google Trends reveals: Focus of interest in the  
20  
21 496 population is on treatment options rather than theories about COVID-19 animal origin. *Brain*  
22  
23 497 *Behav Immun* 2020;87:134-135. Doi: 10.1016/j.bbi.2020.05.005.  
24  
25  
26  
27 498 24 Onchonga D. A Google Trends study on the interest in self-medication during the 2019  
28  
29 499 novel coronavirus (COVID-19) disease pandemic. *Saudi Pharm J* 2020;28:903–4.  
30  
31 500 DOI:10.1016/j.jsps.2020.06.007.  
32  
33  
34  
35 501 25 Yourself & others. How to protect. CDC Center for Disease and Prevention [Internet].  
36  
37 502 <https://www.cdc.gov/coronavirus/2019-ncov/prevent-getting-sick/prevention.html> (Accessed  
38  
39 503 Nov 1, 2021).  
40  
41  
42  
43 504 26 Huynh TLD. The COVID-19 containment in Vietnam: What are we doing? *J Glob Health*  
44  
45 505 2020;10:010338. DOI:10.7189/jogh.10.010338.  
46  
47  
48  
49 506 27 Elachola H, Ebrahim SH, Gozzer E. COVID-19: Facemask use prevalence in international  
50  
51 507 airports in Asia, Europe and the Americas, March 2020. *Travel Med Infect Dis*  
52  
53 508 2020;35:101637. DOI:10.1016/j.tmaid.2020.101637.  
54  
55  
56  
57  
58  
59  
60

- 1  
2  
3 509 28 Siu JY. Qualitative study on the shifting sociocultural meanings of the facemask in Hong  
4  
5 510 Kong since the severe acute respiratory syndrome (SARS) outbreak: Implications for infection  
6  
7 511 control in the post-SARS era. *Int J Equity Health* 2016;15:73. DOI: 10.1186/s12939-016-  
8  
9 512 0358-0.
- 10  
11  
12  
13 513 29 Onishi N, Méheut C. Mask-wearing is a very new fashion in Paris (and a lot of other  
14  
15 514 Places). *New York Times*. [http://www.nytimes.com/2020/04/09/world/europe/hevirus-mask-](http://www.nytimes.com/2020/04/09/world/europe/hevirus-mask-wearing.html)  
16  
17 515 [wearing.html](http://www.nytimes.com/2020/04/09/world/europe/hevirus-mask-wearing.html) (Accessed Nov 1, 2021).
- 18  
19  
20  
21 516 30 World Health Organization. Advice on the use of masks in the community, during home  
22  
23 517 care and in health care settings in the context of the novel coronavirus. nCoV outbreak: Interim  
24  
25 518 guidance. <https://apps.who.int/iris/handle/10665/330987> (Accessed Dec 5, 2021).
- 26  
27  
28  
29 519 31 Leung CC, Lam TH, Cheng KK. Mass masking in the COVID-19 epidemic: People need  
30  
31 520 guidance. *Lancet* 2020;395:945. DOI: 10.1016/S0140-6736(20)30520-1.
- 32  
33  
34  
35 521 32 van der Sande M, Teunis P, Sabel R. Professional and home-made face masks reduce  
36  
37 522 exposure to respiratory infections among the general population. *PLOS ONE* 2008;3:e2618.  
38  
39 523 DOI: 10.1371/journal.pone.0002618.
- 40  
41  
42  
43 524 33 Itaya T, Furuse Y, Jindai K. Does COVID-19 infection impact on the trend of seasonal  
44  
45 525 influenza infection? 11 Countries and regions, from 2014 to 2020. *Int J Infect Dis* 2020;97:78–  
46  
47 526 80. DOI: 10.1016/j.ijid.2020.05.088.
- 48  
49  
50  
51 527 34 Lee H, Lee H, Song KH et al. Impact of public health interventions on seasonal influenza  
52  
53 528 activity during the COVID-19 outbreak in Korea. *Clin Infect Dis* 2021;73:e132–40. DOI:  
54  
55 529 10.1093/cid/ciaa672.

- 1  
2  
3 530 35 Huang QS, Wood T, Jelley L, et al. Impact of the COVID-19 nonpharmaceutical  
4  
5 531 interventions on influenza and other respiratory viral infections in New Zealand. *Nat Commun*  
6  
7 532 2021;12:1001. DOI: 10.1038/s41467-021-21157-9.  
8  
9  
10  
11 533 36 National Institutes of infectious disease, infectious disease weekly report Japan [Internet].  
12  
13 534 <https://www.niid.go.jp/niid/ja/10/weeklygraph.html> (Accessed Dec 5, 2021).  
14  
15  
16  
17 535 37 Share of internet users in Africa as of December 2020, by country. Statista [Internet].  
18  
19 536 <https://www.statista.com/statistics/1124283/internet-penetration-in-africa-by-country/>  
20  
21 537 (Accessed Nov 1, 2021).  
22  
23  
24  
25 538 38 Odeyemi OA, Sani NA, Obadina AO et al. Food safety knowledge, attitudes and practices  
26  
27 539 among consumers in developing countries: An international survey. *Food Res Int*  
28  
29 540 2019;116:1386–90. DOI: 10.1016/j.foodres.2018.10.030.  
30  
31  
32  
33 541 39 Habib MA, Dayyab FM, Iliyasu G et al. Knowledge, attitude and practice survey of  
34  
35 542 COVID-19 pandemic in Northern Nigeria. *PLOS ONE* 2021;16:e0245176. DOI:  
36  
37 543 10.1371/journal.pone.0245176.  
38  
39  
40  
41 544 40 Workneh F, Wang D, Millogo O, et al. Knowledge and practice related to COVID-19 and  
42  
43 545 mental health among adults in sub-Saharan Africa. *Am J Trop Med Hyg* 2021;105:351–62.  
44  
45 546 DOI:10.4269/ajtmh.21-0219.  
46  
47  
48  
49 547 41 Search engine market share China. *Statcounter*.  
50  
51 548 (November 1, 2021) November 2020–. [https://gs.statcounter.com/search-engine-market-](https://gs.statcounter.com/search-engine-market-share/all/chinahttps)  
52  
53 549 [share/all/chinahttps](https://gs.statcounter.com/search-engine-market-share/all/chinahttps) (Accessed Nov 2021); <https://www.>

1  
2  
3 550 [http://nbcnews.com/technology/microsoft-blocks-censorship-skype-china-advocacy-group-](http://nbcnews.com/technology/microsoft-blocks-censorship-skype-china-advocacy-group-2D11664965)  
4  
5 551 [2D11664965](http://nbcnews.com/technology/microsoft-blocks-censorship-skype-china-advocacy-group-2D11664965) (Accessed Nov 1, 2021).  
6  
7  
8  
9 552  
10  
11

## 12 553 **Figure captions**

13  
14  
15 554 **Fig 1.** RSV of “coronavirus,” “wash hand,” “social distancing,” “hand sanitizer,” and “mask” in  
16  
17 555 the combined data for all countries and regions.

18  
19  
20 556 Horizontal axis: depicts the time period. The week of March 11, 2020, when the WHO declared a  
21  
22 557 pandemic, is set to 0 and increases thereafter. The weeks following the week of the pandemic  
23  
24 558 declaration are numbered as 1, 2, 3, and so on, until the 85th week (85 depicts the 85th week). The  
25  
26 559 week before the pandemic declaration (0) is numbered -1 for the week before, -2 for two weeks  
27  
28 560 before, and so on, until the 85th week (-85 means 85 weeks before the declaration of the pandemic).

29  
30 561 Vertical axis: relative search volume (RSV) value  
31  
32

33  
34 562 Figure 1 was created using Microsoft Excel (Microsoft Inc., Seattle, WA, USA).  
35  
36 563

37  
38 564 **Fig 2.** Distribution trend of countries with “coronavirus,” “wash hand,” “social distancing,” “hand  
39  
40 565 sanitizer,” and “mask” with relative search volume (RSV)  $\geq 50$  after the coronavirus disease 2019  
41  
42 566 (COVID-19) pandemic

43  
44 567 Area colored red: countries with RSV “coronavirus”  $\geq 50$

45  
46 568 Are colored gray: countries without valid data

47  
48 569 Figure 2 was created using QGIS version 3.24 with background map data obtained from

49  
50 570 OpenStreetMap contributors ([www.openstreetmap.org](http://www.openstreetmap.org)).  
51  
52 571

1  
2  
3 572 **Fig 3.** Distribution of countries with statistically significant relative search volume (RSV) of  
4  
5 573 “coronavirus,” “wash hand,” “social distancing,” “hand sanitizer,” and “mask” in the last 20 weeks  
6  
7  
8 574 compared with that before the coronavirus disease 2019 (COVID-19) pandemic.

9  
10 575 Area colored red: countries with statistical significance in the last 20 weeks versus before the  
11  
12 576 COVID-19 pandemic.

13  
14 577 Area colored gray: countries without valid data

15  
16  
17 578 Figure 3 was created using QGIS version 3.24 with background map data obtained from

18  
19 579 OpenStreetMap contributors ([www.openstreetmap.org](http://www.openstreetmap.org)).



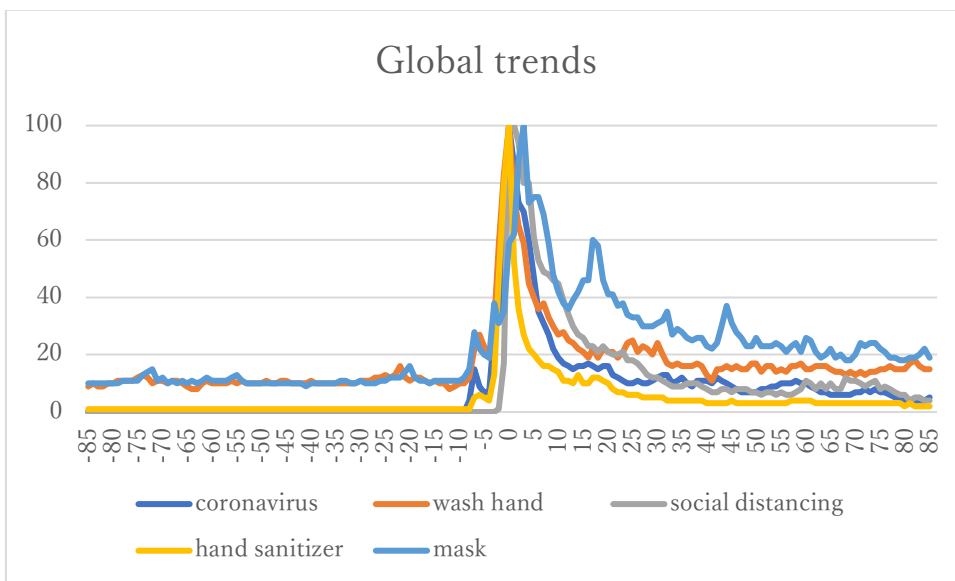

peer review only

“coronavirus” RSV trends

(A) “coronavirus” RSV for the week of January 26, 2020

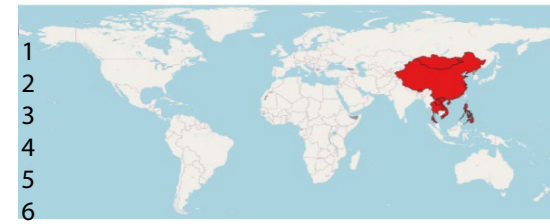

(B) “coronavirus” RSV for the week of February 23, 2020

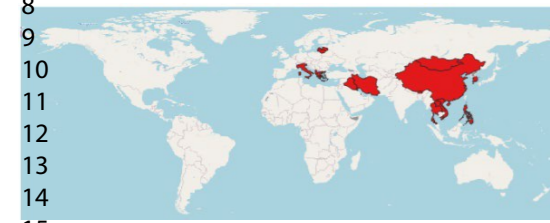

(C) “coronavirus” RSV for the week of March 8, 2020

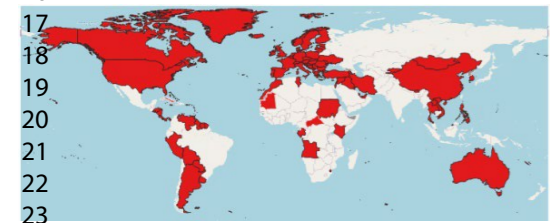

(D) “coronavirus” RSV for the week of March 22, 2020

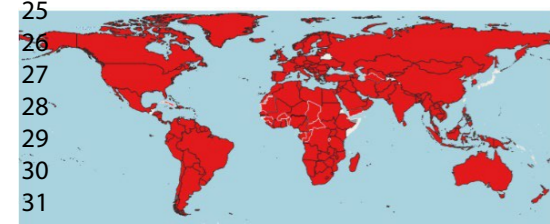

(E) “coronavirus” RSV for the week of April 5, 2020

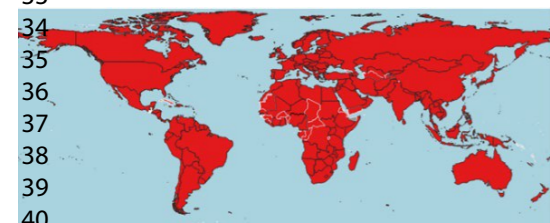

“wash hand” RSV trends

(A) “Wash hand” RSV for the week of January 26, 2020

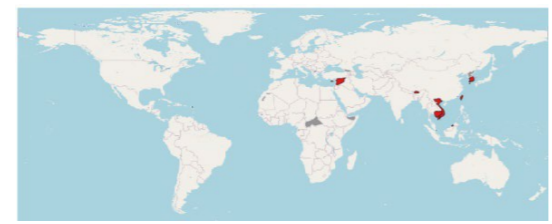

(B) “wash hand” RSV for the week of February 23, 2020

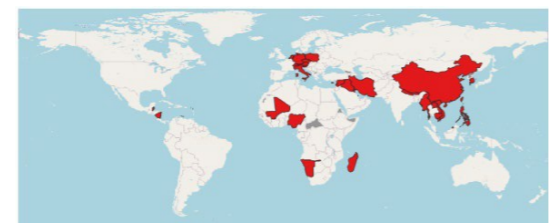

(C) “wash hand” RSV for the week of March 8, 2020

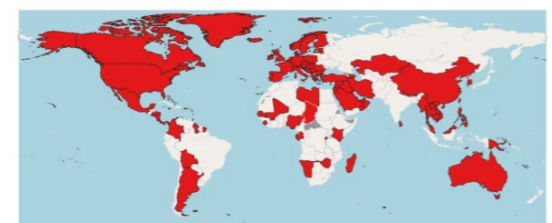

(D) “wash hand” RSV for the week of March 22, 2020

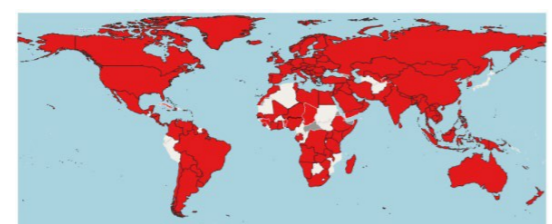

(E) “wash hand” RSV for the week of April 5, 2020

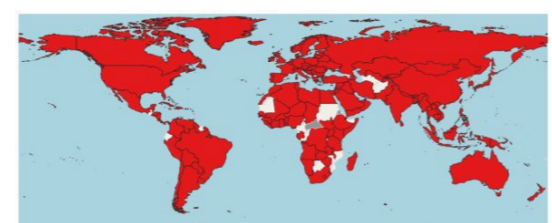

“social distancing” RSV trends

(A) “social distancing” RSV for the week of January 26, 2020

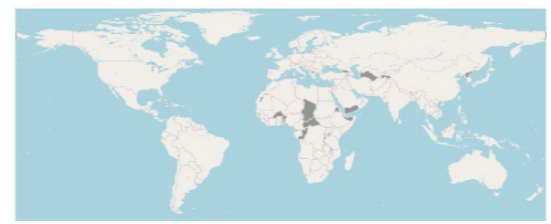

(B) “social distancing” RSV for the week of February 23, 2020

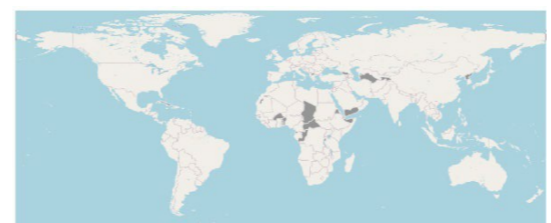

(C) “social distancing” RSV for the week of March 8, 2020

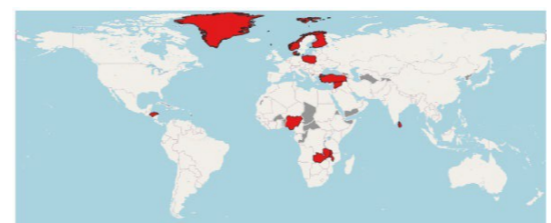

(D) “social distancing” RSV for the week of March 22, 2020

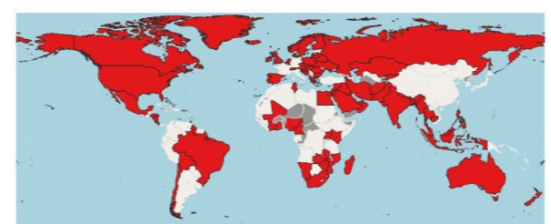

(E) “social distancing” RSV for the week of April 5, 2020

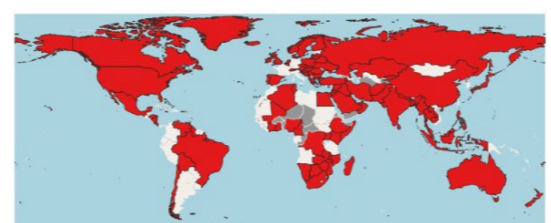

“hand sanitizer” RSV trends

(A) “hand sanitizer” RSV for the week of January 26, 2020

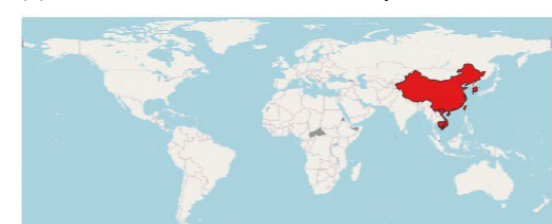

(B) “hand sanitizer” RSV for the week of February 23, 2020

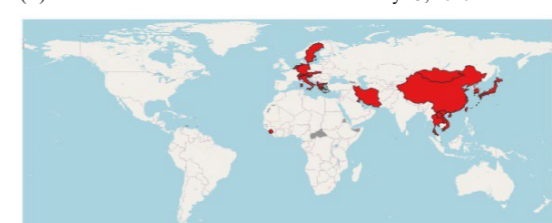

(C) “hand sanitizer” RSV for the week of March 8, 2020

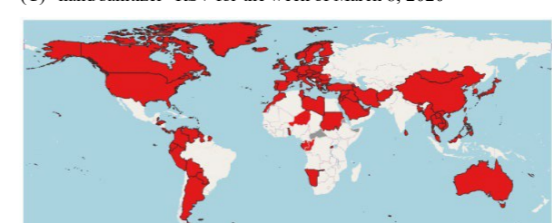

(D) “hand sanitizer” RSV for the week of March 22, 2020

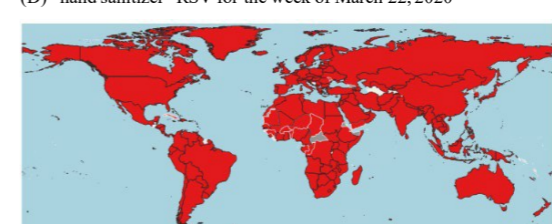

(E) “hand sanitizer” RSV for the week of April 5, 2020

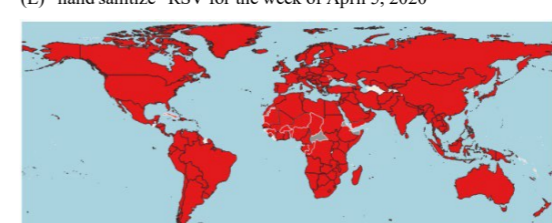

“mask” RSV trends

(A) “mask” RSV for the week of January 26, 2020

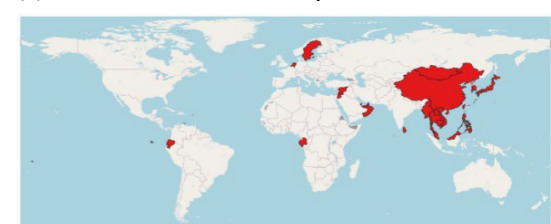

(B) “mask” RSV for the week of February 23, 2020

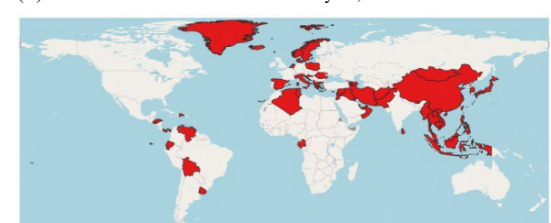

(C) “mask” RSV for the week of March 8, 2020

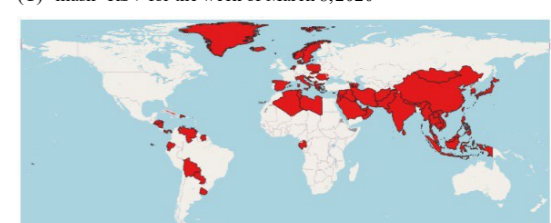

(D) “mask” RSV for the week of March 22, 2020

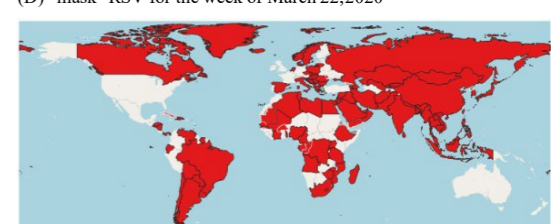

(E) “mask” RSV for the week of April 5, 2020

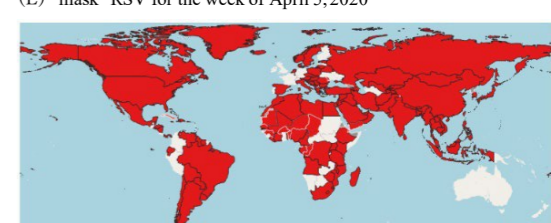

1 (A) Countries with significant difference of 'coronavirus' RSV in the first 20 weeks and the last 20 weeks

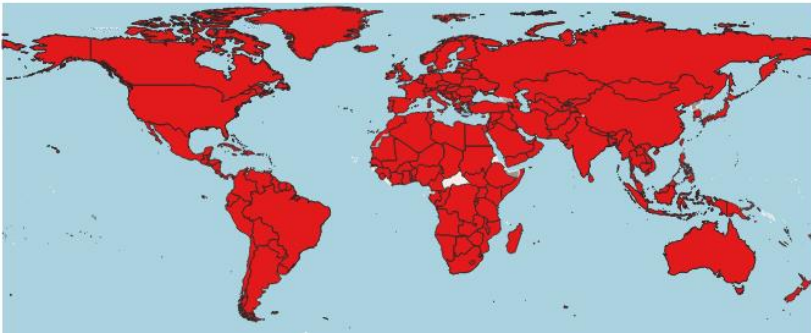

12 (B) Countries with significant difference of 'wash hand' RSV in the first 20 weeks and the last 20 weeks

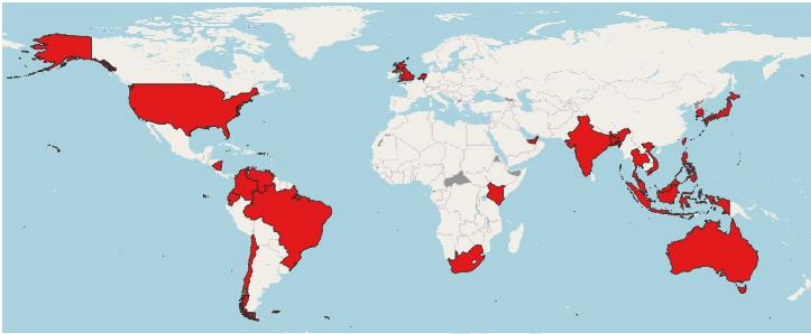

24 (C) Countries with significant difference of 'social distancing' RSV in the first 20 weeks and the last 20 weeks

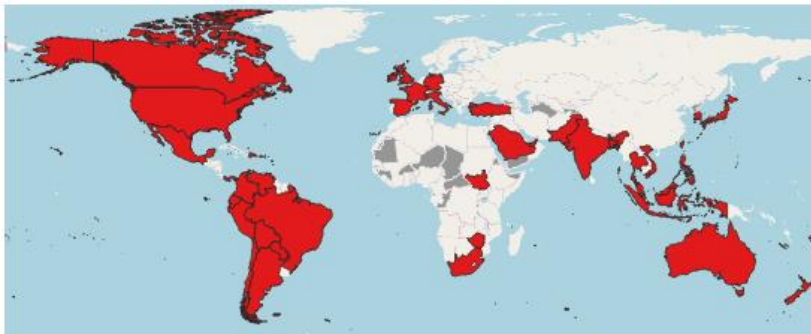

36 (D) Countries with significant difference of 'hand sanitizer' RSV in the first 20 weeks and the last 20 weeks

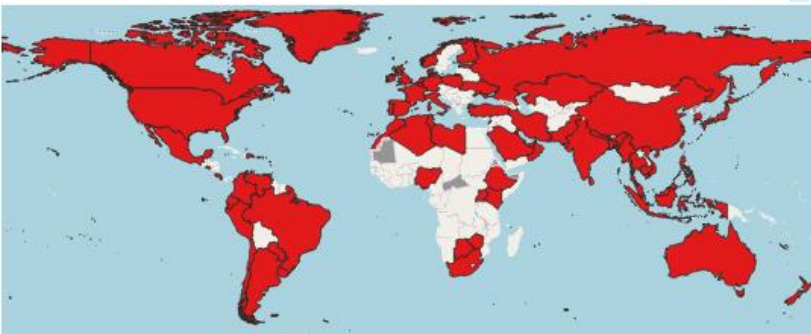

48 (E) Countries with significant difference of 'mask' RSV in the first 20 weeks and the last 20 weeks

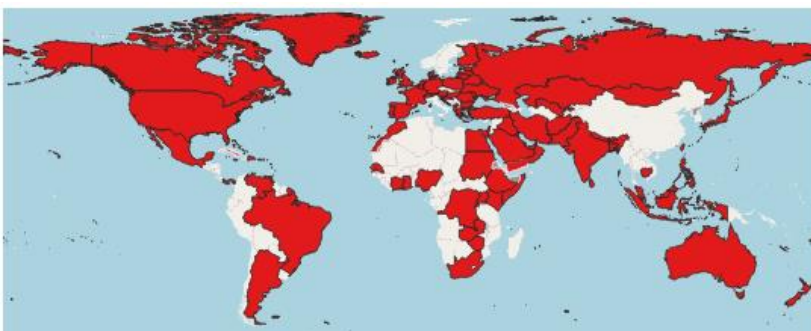

STROBE Statement—checklist of items that should be included in reports of observational studies

|                           | Item No | Recommendation                                                                                                                                                                                                                                                                                                                                                                                                                                                         | Page No. | Relevant text from manuscript                                                                                                                                                        |
|---------------------------|---------|------------------------------------------------------------------------------------------------------------------------------------------------------------------------------------------------------------------------------------------------------------------------------------------------------------------------------------------------------------------------------------------------------------------------------------------------------------------------|----------|--------------------------------------------------------------------------------------------------------------------------------------------------------------------------------------|
| <b>Title and abstract</b> | 1       | (a) Indicate the study’s design with a commonly used term in the title or the abstract                                                                                                                                                                                                                                                                                                                                                                                 | 1, 2     | Line 2 and line 29.<br>Design: An infodemiology and infoveillance study                                                                                                              |
|                           |         | (b) Provide in the abstract an informative and balanced summary of what was done and what was found                                                                                                                                                                                                                                                                                                                                                                    | 2,3      | Lines 23-46, Abstract                                                                                                                                                                |
| <b>Introduction</b>       |         |                                                                                                                                                                                                                                                                                                                                                                                                                                                                        |          |                                                                                                                                                                                      |
| Background/rationale      | 2       | Explain the scientific background and rationale for the investigation being reported                                                                                                                                                                                                                                                                                                                                                                                   | 4,5      | Introduction (lines 66-102).                                                                                                                                                         |
| Objectives                | 3       | State specific objectives, including any prespecified hypotheses                                                                                                                                                                                                                                                                                                                                                                                                       | 5.6      | Introduction (lines 103-110).                                                                                                                                                        |
| <b>Methods</b>            |         |                                                                                                                                                                                                                                                                                                                                                                                                                                                                        |          |                                                                                                                                                                                      |
| Study design              | 4       | Present key elements of study design early in the paper                                                                                                                                                                                                                                                                                                                                                                                                                | 6        | MATERIALS AND METHODS (lines 113-114).<br>Google Trends was used to quantify and measure changes in internet searches regarding the COVID-19 pandemic worldwide and in each country. |
| Setting                   | 5       | Describe the setting, locations, and relevant dates, including periods of recruitment, exposure, follow-up, and data collection                                                                                                                                                                                                                                                                                                                                        | 6-8      | MATERIALS AND METHODS (lines 115-167)                                                                                                                                                |
| Participants              | 6       | (a) <i>Cohort study</i> —Give the eligibility criteria, and the sources and methods of selection of participants. Describe methods of follow-up<br><i>Case-control study</i> —Give the eligibility criteria, and the sources and methods of case ascertainment and control selection. Give the rationale for the choice of cases and controls<br><i>Cross-sectional study</i> —Give the eligibility criteria, and the sources and methods of selection of participants | 7        | Line 145: 196 countries and regions around the world                                                                                                                                 |

|                           |    |                                                                                                                                                                                      |     |                                                                                                                                                                                        |
|---------------------------|----|--------------------------------------------------------------------------------------------------------------------------------------------------------------------------------------|-----|----------------------------------------------------------------------------------------------------------------------------------------------------------------------------------------|
|                           |    | (b) <i>Cohort study</i> —For matched studies, give matching criteria and number of exposed and unexposed                                                                             | N/A | N/A                                                                                                                                                                                    |
|                           |    | <i>Case-control study</i> —For matched studies, give matching criteria and the number of controls per case                                                                           |     |                                                                                                                                                                                        |
| Variables                 | 7  | Clearly define all outcomes, exposures, predictors, potential confounders, and effect modifiers. Give diagnostic criteria, if applicable                                             | 7.8 | Lines 144-167.                                                                                                                                                                         |
| Data sources/ measurement | 8* | For each variable of interest, give sources of data and details of methods of assessment (measurement). Describe comparability of assessment methods if there is more than one group | 6-8 | Lines 115-167                                                                                                                                                                          |
| Bias                      | 9  | Describe any efforts to address potential sources of bias                                                                                                                            | 7   | Line 127-135 This method allowed us to understand the situation on a global level, including in countries where English is not the native language.                                    |
| Study size                | 10 | Explain how the study size was arrived at                                                                                                                                            | 7   | Line 145: 196 countries and regions around the world                                                                                                                                   |
| Quantitative variables    | 11 | Explain how quantitative variables were handled in the analyses. If applicable, describe which groupings were chosen and why                                                         | 8   | Lines 156-167                                                                                                                                                                          |
| Statistical methods       | 12 | (a) Describe all statistical methods, including those used to control for confounding                                                                                                | 8-9 | Lines 168-174                                                                                                                                                                          |
|                           |    | (b) Describe any methods used to examine subgroups and interactions                                                                                                                  | N/A | N/A                                                                                                                                                                                    |
|                           |    | (c) Explain how missing data were addressed                                                                                                                                          | 6   | Lines 125-126<br>When a sufficient number of searches cannot be confirmed for a search keyword or topic in a specified country, the system displays that the data cannot be retrieved. |
|                           |    | (d) <i>Cohort study</i> —If applicable, explain how loss to follow-up was addressed                                                                                                  | N/A | N/A                                                                                                                                                                                    |
|                           |    | <i>Case-control study</i> —If applicable, explain how matching of cases and controls                                                                                                 |     |                                                                                                                                                                                        |

1  
2  
3  
4  
5  
6  
7  
8  
9  
10  
11  
12  
13  
14  
15  
16  
17  
18  
19  
20  
21  
22  
23  
24  
25  
26  
27  
28  
29  
30  
31  
32  
33  
34  
35  
36  
37  
38  
39  
40  
41  
42  
43  
44  
45  
46

was addressed

*Cross-sectional study*—If applicable, describe analytical methods taking account of sampling strategy

(e) Describe any sensitivity analyses

N/A

N/A

Continued on next page

For peer review only

**Results**

|                   |     |                                                                                                                                                                                                              |             |                                                                                                                                                                                        |
|-------------------|-----|--------------------------------------------------------------------------------------------------------------------------------------------------------------------------------------------------------------|-------------|----------------------------------------------------------------------------------------------------------------------------------------------------------------------------------------|
| Participants      | 13* | (a) Report numbers of individuals at each stage of study—e.g. numbers potentially eligible, examined for eligibility, confirmed eligible, included in the study, completing follow-up, and analysed          | 10,14,15,16 | Lines 197, 210, 225, 236, 246                                                                                                                                                          |
|                   |     | (b) Give reasons for non-participation at each stage                                                                                                                                                         | 6           | Lines 125-126<br>When a sufficient number of searches cannot be confirmed for a search keyword or topic in a specified country, the system displays that the data cannot be retrieved. |
|                   |     | (c) Consider use of a flow diagram                                                                                                                                                                           | N/A         | N/A                                                                                                                                                                                    |
| Descriptive data  | 14* | (a) Give characteristics of study participants (eg demographic, clinical, social) and information on exposures and potential confounders                                                                     | 7           | Line 145:<br>196 countries and regions around the world                                                                                                                                |
|                   |     | (b) Indicate number of participants with missing data for each variable of interest                                                                                                                          | 10,14,15,16 | Lines 197, 210, 225, 236, 246                                                                                                                                                          |
|                   |     | (c) <i>Cohort study</i> —Summarise follow-up time (eg, average and total amount)                                                                                                                             | N/A         | N/A                                                                                                                                                                                    |
| Outcome data      | 15* | <i>Cohort study</i> —Report numbers of outcome events or summary measures over time                                                                                                                          | N/A         | N/A                                                                                                                                                                                    |
|                   |     | <i>Case-control study</i> —Report numbers in each exposure category, or summary measures of exposure                                                                                                         | N/A         | N/A                                                                                                                                                                                    |
|                   |     | <i>Cross-sectional study</i> —Report numbers of outcome events or summary measures                                                                                                                           | 9-19        | Lines 185-305                                                                                                                                                                          |
| Main results      | 16  | (a) Give unadjusted estimates and, if applicable, confounder-adjusted estimates and their precision (eg, 95% confidence interval). Make clear which confounders were adjusted for and why they were included | N/A         | N/A                                                                                                                                                                                    |
|                   |     | (b) Report category boundaries when continuous variables were categorized                                                                                                                                    | N/A         | N/A                                                                                                                                                                                    |
|                   |     | (c) If relevant, consider translating estimates of relative risk into absolute risk for a meaningful time period                                                                                             | N/A         | N/A                                                                                                                                                                                    |
| Other analyses    | 17  | Report other analyses done—eg analyses of subgroups and interactions, and sensitivity analyses                                                                                                               | N/A         | N/A                                                                                                                                                                                    |
| <b>Discussion</b> |     |                                                                                                                                                                                                              |             |                                                                                                                                                                                        |
| Key results       | 18  | Summarise key results with reference to study objectives                                                                                                                                                     | 23          | Lines 406-412                                                                                                                                                                          |

1  
2  
3  
4  
5  
6  
7  
8  
9  
10  
11  
12  
13  
14  
15  
16  
17  
18  
19  
20  
21  
22  
23  
24  
25  
26  
27  
28  
29  
30  
31  
32  
33  
34  
35  
36  
37  
38  
39  
40  
41  
42  
43  
44  
45  
46

|                  |    |                                                                                                                                                                            |       |               |
|------------------|----|----------------------------------------------------------------------------------------------------------------------------------------------------------------------------|-------|---------------|
| Limitations      | 19 | Discuss limitations of the study, taking into account sources of potential bias or imprecision.<br>Discuss both direction and magnitude of any potential bias              | 23    | Lines 394-404 |
| Interpretation   | 20 | Give a cautious overall interpretation of results considering objectives, limitations, multiplicity of analyses, results from similar studies, and other relevant evidence | 19-23 | Lines 317-404 |
| Generalisability | 21 | Discuss the generalisability (external validity) of the study results                                                                                                      | 23    | Lines 394-404 |

---

**Other information**


---

|         |    |                                                                                                                                                               |    |               |
|---------|----|---------------------------------------------------------------------------------------------------------------------------------------------------------------|----|---------------|
| Funding | 22 | Give the source of funding and the role of the funders for the present study and, if applicable, for the original study on which the present article is based | 24 | Lines 421-423 |
|---------|----|---------------------------------------------------------------------------------------------------------------------------------------------------------------|----|---------------|

\*Give information separately for cases and controls in case-control studies and, if applicable, for exposed and unexposed groups in cohort and cross-sectional studies.

**Note:** An Explanation and Elaboration article discusses each checklist item and gives methodological background and published examples of transparent reporting. The STROBE checklist is best used in conjunction with this article (freely available on the Web sites of PLoS Medicine at <http://www.plosmedicine.org/>, Annals of Internal Medicine at <http://www.annals.org/>, and Epidemiology at <http://www.epidem.com/>). Information on the STROBE Initiative is available at [www.strobe-statement.org](http://www.strobe-statement.org).
